# Supplementary material for: An Extensive Alien Plant Inventory from the Inhabited Areas of Galapagos
Source: PubMed Central journal article supplement (PMC2858082; doi:10.1371/journal.pone.0010276), 2010-04-21
Supplement: pone.0010276.s001.pdf [file pone.0010276.s001.pdf]

| Family        | Species name                                                                  | Common name English (local-Spanish)                    | Introduction status in Galapagos | Growth form | Use | % of visited rural properties | % of fully surveyed urban properties | Floreana_rural | Isabela_rural | San Cristobal_rural | Santa Cruz_rural | Floreana_urban | Isabela_urban | San Cristobal_urban | Santa Cruz_urban |
|---------------|-------------------------------------------------------------------------------|--------------------------------------------------------|----------------------------------|-------------|-----|-------------------------------|--------------------------------------|----------------|---------------|---------------------|------------------|----------------|---------------|---------------------|------------------|
| Acanthaceae   | <i>Asystasia gangetica</i> (L.) T. Anderson <sup>†</sup>                      |                                                        | Cu                               | h           | orn | 0.4                           | 0.6                                  |                |               | X                   |                  |                |               | X                   | X                |
| Acanthaceae   | <i>Crossandra infundibuliformes</i> Nees <sup>1</sup>                         |                                                        | Cu                               | ssh         | orn | 0.2                           | 0.2                                  |                |               | X                   |                  |                |               | X                   |                  |
| Acanthaceae   | <i>Elytraria imbricata</i> (Vahl) Pers.                                       |                                                        | Ac                               | h           | non | 4.4                           | 0.1                                  |                | X             |                     |                  |                |               |                     | X                |
| Acanthaceae   | <i>Fittonia albivenis</i> (Lindl. ex Veitch) Brummitt <sup>†</sup>            |                                                        | Cu                               | h           | orn |                               | 0.1                                  |                |               |                     |                  |                |               | X                   | X                |
| Acanthaceae   | <i>Hypoestes phyllostachya</i> Baker <sup>1</sup>                             |                                                        | Cu                               | h           | orn | 0.9                           | 0.2                                  |                |               | X                   |                  |                |               | X                   | X                |
| Acanthaceae   | <i>Justicia brandegeana</i> Wassh. & L.B. Sm. <sup>1</sup>                    | Shrimp Plant (flor de camarón)                         | Cu                               | h           | orn | 1.3                           | 0.5                                  |                |               | X                   | X                |                |               | X                   |                  |
| Acanthaceae   | <i>Justicia carnea</i> Lindl. <sup>1</sup>                                    | (cola de pavo real)                                    | Cu                               | sh          | orn | 0.7                           | 0.6                                  |                |               | X                   |                  |                |               | X                   | X                |
| Acanthaceae   | <i>Megaskepasma erythrochlamys</i> Lindau <sup>1</sup>                        |                                                        | Cu                               | sh          | orn |                               | <0.1                                 |                |               |                     |                  |                |               | X                   |                  |
| Acanthaceae   | <i>Odontonema cuspidatum</i> (Nees) Kuntze                                    | (lava botellas)                                        | Es                               | sh          | orn | 4.2                           | 1.1                                  |                | X             | X                   | X                |                | X             | X                   | X                |
| Acanthaceae   | <i>Pachystachys lutea</i> Nees                                                | Golden Shrimp-plant (rabito de gallo, flor de camarón) | Cu                               | sh          | orn | 0.7                           | 0.4                                  |                |               | X                   | X                |                |               | X                   | X                |
| Acanthaceae   | <i>Pseuderanthemum carruthersii</i> (Seem.) Guillaumin                        |                                                        | Cu                               | sh          | orn | 8.4                           | 6.1                                  | X              | X             | X                   | X                | X              | X             | X                   | X                |
| Acanthaceae   | <i>Ruellia malacosperma</i> Greenm. <sup>1</sup>                              |                                                        | Es                               | h           | orn | 0.5                           | 0.4                                  |                | X             | X                   |                  |                | X             |                     | X                |
| Acanthaceae   | <i>Sanchezia speciosa</i> Leonard <sup>1</sup>                                |                                                        | Cu                               | sh          | orn | 0.2                           | <0.1                                 |                |               | X                   |                  |                |               | X                   |                  |
| Acanthaceae   | <i>Thunbergia fragrans</i> Roxb.                                              |                                                        | Es                               | v           | orn | 9.7                           | 0.3                                  |                |               | X                   |                  |                |               | X                   |                  |
| Actinidiaceae | <i>Actinidia deliciosa</i> (A. Chev.) C.F. Liang & A.R. Ferguson <sup>1</sup> | kiwifruit (kiwi)                                       | Cu                               | v           | edi | 0.4                           |                                      |                |               | X                   |                  |                |               |                     |                  |
| Agavaceae     | <i>Agave americana</i> L.                                                     | Century Plant (cabuya negra, penco)                    | Cu                               | s           | orn | 1.5                           | 0.6                                  |                | X             | X                   | X                |                | X             | X                   | X                |
| Agavaceae     | <i>Agave angustifolia</i> var. <i>marginata</i> hort. ex Gentry <sup>1</sup>  |                                                        | Cu                               | s           | orn | 1.1                           | 1.2                                  |                | X             |                     |                  |                | X             | X                   | X                |
| Agavaceae     | <i>Agave attenuata</i> Salm-Dyck <sup>1</sup>                                 |                                                        | Cu                               | h           | orn | 0.2                           | nfs                                  |                |               |                     | X                |                |               |                     |                  |
| Agavaceae     | <i>Furcraea hexapetala</i> (Jacq.) Urb.                                       | (cabuya, penco blanco)                                 | Es                               | s           | orn | 23.4                          | 0.8                                  | X              | X             | X                   | X                | X              | X             | X                   | X                |
| Agavaceae     | <i>Yucca aloifolia</i> L. <sup>1</sup>                                        |                                                        | Cu                               | sh          | orn | 0.4                           | 0.1                                  |                |               | X                   | X                |                |               |                     | X                |
| Agavaceae     | <i>Yucca guatemalensis</i> Baker <sup>1</sup>                                 | (flor de novia, peine de indio)                        | Cu                               | sh          | orn | 15.8                          | 2.5                                  |                | X             | X                   | X                |                | X             | X                   | X                |
| Aizoaceae     | <i>Aptenia cordifolia</i> (L. f.) Schwantes <sup>1</sup>                      |                                                        | Cu                               | s           | orn | 1.5                           | 2.6                                  |                | X             | X                   |                  | X              | X             | X                   | X                |
| Aizoaceae     | <i>Lampranthus aureus</i> (L.) N.E. Br.                                       |                                                        | Cu                               | ssh         | orn |                               | 0.1                                  |                |               |                     |                  |                |               |                     | X                |
| Aizoaceae     | <i>Tetragonia tetragonioides</i> (Pall.) Kuntze <sup>1</sup>                  | New Zealandspinach (espinaca)                          | Cu                               | h           | edi | 2.9                           | 0.6                                  |                | X             | X                   |                  |                | X             | X                   | X                |
| Alliaceae     | <i>Allium cepa</i> L.                                                         | Onion, Spring onion (cebolla paitaña, cebolla blanca)  | Cu                               | h           | edi | 17.6                          | 1.6                                  |                | X             | X                   | X                | X              | X             | X                   | X                |
| Alliaceae     | <i>Allium porrum</i> L.                                                       | Leek (cebolla puerro)                                  | Cu                               | h           | edi | 1.1                           | 0.1                                  |                |               | X                   | X                |                |               |                     | X                |
| Alliaceae     | <i>Allium sativum</i> L.                                                      | Garlic (ajo)                                           | Cu                               | h           | edi | 1.3                           | 0.3                                  |                |               | X                   | X                | X              | X             |                     | X                |

| Family         | Species name                                                      | Common name English (local-Spanish) | Introduction status in Galapagos | Growth form | Use | % of visited rural properties | % of fully surveyed urban properties | Floreana_rural | Isabela_rural | San Cristobal_rural | Santa Cruz_rural | Floreana_urban | Isabela_urban | San Cristobal_urban | Santa Cruz_urban |
|----------------|-------------------------------------------------------------------|-------------------------------------|----------------------------------|-------------|-----|-------------------------------|--------------------------------------|----------------|---------------|---------------------|------------------|----------------|---------------|---------------------|------------------|
| Alliaceae      | <i>Allium schoenoprasum</i> L. <sup>1</sup>                       | Chives (cebollín)                   | Cu                               | h           | edi | 0.7                           | 0.3                                  | X              | X             |                     | X                | X              | X             | X                   | X                |
| Amaranthaceae  | <i>Achyranthes aspera</i> L.                                      |                                     | Ac                               | h           | non | 36.6                          | 0.1                                  |                | X             | X                   |                  |                | X             | X                   |                  |
| Amaranthaceae  | <i>Alternanthera mexicana</i> (Schltdl.) Hieron.                  | (escansel)                          | NaQ                              | h           | orn | 3.1                           | 0.1                                  |                | X             | X                   | X                |                |               | X                   | X                |
| Amaranthaceae  | <i>Alternanthera sessilis</i> (L.) R. Br.                         |                                     | Ac                               | h           | non |                               | 0.1                                  |                |               |                     |                  |                |               |                     | X                |
| Amaranthaceae  | <i>Alternanthera tenella</i> Colla <sup>1</sup>                   | (pata de paloma)                    | Cu                               | h           | orn | 0.2                           | 0.5                                  |                | X             |                     |                  | X              | X             |                     | X                |
| Amaranthaceae  | <i>Amaranthus caudatus</i> L.                                     | (sangorache verde, quinua)          | Cu                               | h           | edi | 0.4                           | 0.1                                  |                |               |                     | X                |                | X             | X                   |                  |
| Amaranthaceae  | <i>Amaranthus dubius</i> Mart. ex Thell.                          |                                     | Ac                               | h           | non | 5.7                           | *22.4                                | X              | X             | X                   |                  | X              | X             | X                   | X                |
| Amaranthaceae  | <i>Amaranthus hybridus</i> L.                                     | (amaranto)                          | AcQ                              | h           | non | 0.4                           | <0.1                                 |                | X             |                     |                  |                |               |                     | X                |
| Amaranthaceae  | <i>Amaranthus lividus</i> L.                                      |                                     | Ac                               | h           | non | 6.6                           | 1.8                                  |                | X             | X                   | X                |                | X             | X                   | X                |
| Amaranthaceae  | <i>Amaranthus spinosus</i> L.                                     |                                     | Ac                               | h           | non | 8.2                           | 1.0                                  | X              | X             | X                   |                  |                | X             | X                   | X                |
| Amaranthaceae  | <i>Amaranthus viridis</i> L.                                      | (amarantus)                         | AcQ                              | h           | non | 1.3                           | 0.5                                  |                | X             | X                   |                  |                |               | X                   | X                |
| Amaranthaceae  | <i>Celosia argentea argentea</i> L.                               | (rabo de conejo)                    | Es                               | h           | orn | 2.0                           | 1.1                                  |                | X             | X                   | X                | X              | X             | X                   | X                |
| Amaranthaceae  | <i>Celosia argentea cristata</i> (L.) Kuntze                      | (cresta de gallo)                   | Es                               | h           | orn | 0.9                           | 0.5                                  |                | X             | X                   | X                |                | X             | X                   | X                |
| Amaranthaceae  | <i>Gomphrena globosa</i> L.                                       |                                     | Cu                               | h           | orn |                               | 0.1                                  |                |               |                     |                  |                |               | X                   |                  |
| Amaranthaceae  | <i>Iresine herbstii</i> Hook. <sup>1</sup>                        |                                     | Cu                               | h           | orn | 0.2                           | 0.2                                  |                |               |                     | X                |                |               | X                   | X                |
| Amaranthaceae  | <i>Iresine lindenii</i> Van Houtte <sup>1</sup>                   |                                     | Cu                               | h           | orn |                               | <0.1                                 |                |               |                     |                  |                |               |                     | X                |
| Amaryllidaceae | <i>Crinum x amabile</i> var. <i>augustum</i> (Roxb.) Ker Gawl.    | (amancay, lirio de cinta)           | Cu                               | h           | orn | 0.7                           | 1.8                                  |                |               |                     | X                |                | X             | X                   | X                |
| Amaryllidaceae | <i>Crinum zeylanicum</i> (L.) L.                                  |                                     | Cu                               | h           | orn | 0.7                           | 0.1                                  |                |               | X                   | X                |                |               | X                   | X                |
| Amaryllidaceae | <i>Eucharis x grandiflora</i> Planch. & Linden                    |                                     | Cu                               | h           | orn | 3.8                           | 1.9                                  |                | X             | X                   | X                | X              | X             | X                   | X                |
| Amaryllidaceae | <i>Eucrosia bicolor</i> Ker Gawler                                |                                     | Cu                               | h           | orn | 0.4                           | 1.1                                  |                |               | X                   |                  |                | X             | X                   |                  |
| Amaryllidaceae | <i>Hippeastrum puniceum</i> (Lam.) Kuntze                         |                                     | Cu                               | h           | orn | 5.1                           | 3.0                                  | X              | X             | X                   | X                | X              | X             | X                   | X                |
| Amaryllidaceae | <i>Hippeastrum reticulatum</i> Herb. <sup>1</sup>                 |                                     | Cu                               | h           | orn | 1.1                           | 0.1                                  |                |               | X                   |                  |                | X             |                     | X                |
| Amaryllidaceae | <i>Hippeastrum x Dutch hybrids</i> <sup>1</sup>                   | Amaryllis (amarilis)                | Cu                               | h           | orn | 0.2                           | 0.1                                  |                |               | X                   |                  |                | X             |                     |                  |
| Amaryllidaceae | <i>Hymenocallis pedalis</i> Herb.                                 |                                     | Cu                               | h           | orn | 4.4                           | 0.8                                  | X              |               | X                   |                  | X              | X             | X                   | X                |
| Amaryllidaceae | <i>Scadoxus multiflorus</i> (L.) Friis & Nordal <sup>1</sup>      |                                     | Cu                               | h           | orn |                               | 0.1                                  |                |               |                     |                  |                |               | X                   |                  |
| Amaryllidaceae | <i>Zephyranthes rosea</i> var. <i>candida</i> Lindl. <sup>1</sup> |                                     | Cu                               | h           | orn | 3.5                           | 3.1                                  |                |               | X                   | X                |                | X             | X                   | X                |
| Anacardiaceae  | <i>Mangifera indica</i> L.                                        | Mango (mango)                       | Es                               | t           | edi | 31.3                          | 13.7                                 | X              | X             | X                   | X                | X              | X             | X                   | X                |
| Anacardiaceae  | <i>Schinus molle</i> L.                                           | (molle)                             | Cu                               | t           | orn |                               | 0.1                                  |                |               |                     |                  | X              |               | X                   |                  |
| Anacardiaceae  | <i>Spondias purpurea</i> L.                                       | (ciruelo, ovito)                    | Es                               | t           | edi | 56.6                          | *18.7                                | X              | X             | X                   | X                | X              | X             | X                   | X                |
| Annonaceae     | <i>Annona cherimola</i> Mill.                                     | Cherimoya (chirimoya)               | Es                               | sh          | edi | 12.6                          | 6.0                                  |                | X             | X                   | X                |                | X             | X                   | X                |
| Annonaceae     | <i>Annona glabra</i> L.                                           | Pond Apple (anona)                  | NaQ                              | t           | non |                               | 2.2                                  |                |               |                     |                  |                | X             |                     |                  |
| Annonaceae     | <i>Annona muricata</i> L.                                         | Soursop (guanábana)                 | Es                               | t           | edi | 11.5                          | 9.4                                  | X              | X             | X                   | X                | X              | X             | X                   | X                |
| Anthericaceae  | <i>Chlorophytum comosum</i> (Thunb.) Jacques                      | (mala madre)                        | Cu                               | h           | orn | 2.2                           | 3.0                                  |                |               | X                   | X                |                | X             | X                   | X                |
| Apiaceae       | <i>Anethum graveolens</i> L.                                      | (eneldo)                            | Cu                               | h           | med | 0.2                           | <0.1                                 |                | X             |                     |                  |                |               | X                   |                  |
| Apiaceae       | <i>Apium graveolens</i> L.                                        | Celery (apio)                       | Cu                               | h           | edi | 4.9                           | 0.4                                  |                | X             | X                   | X                |                | X             | X                   | X                |
| Apiaceae       | <i>Coriandrum sativum</i> L.                                      | Coriander (culantro, cilantro)      | Cu                               | h           | edi | 14.1                          | 0.9                                  | X              | X             | X                   | X                | X              | X             | X                   | X                |

| Family      | Species name                                                                  | Common name English (local-Spanish)         | Introduction status in Galapagos | Growth form | Use | % of visited rural properties | % of fully surveyed urban properties | Floreana_rural | Isabela_rural | San Cristobal_rural | Santa Cruz_rural | Floreana_urban | Isabela_urban | San Cristobal_urban | Santa Cruz_urban |
|-------------|-------------------------------------------------------------------------------|---------------------------------------------|----------------------------------|-------------|-----|-------------------------------|--------------------------------------|----------------|---------------|---------------------|------------------|----------------|---------------|---------------------|------------------|
| Apiaceae    | <i>Cyclospermum leptophyllum</i> (Pers.) Sprague ex Britton & P. Wilson       | (puccio)                                    | NaQ                              | h           | non | 28.9                          | 0.1                                  | X              | X             | X                   |                  |                |               | X                   | X                |
| Apiaceae    | <i>Daucus carota</i> L.                                                       | Carrot (zanahoria)                          | Cu                               | h           | edi | 8.6                           | 0.3                                  | X              | X             | X                   | X                |                | X             | X                   | X                |
| Apiaceae    | <i>Eryngium foetidum</i> L. <sup>1</sup>                                      | False Coriander (culantrillo de monte)      | Cu                               | h           | edi | 2.4                           | 0.2                                  |                |               | X                   |                  |                |               | X                   | X                |
| Apiaceae    | <i>Foeniculum vulgare</i> Mill.                                               | Fennel (hinojo, lecherillo, eneldo)         | Cu                               | h           | med | 0.4                           | <0.1                                 |                |               | X                   | X                |                |               |                     | X                |
| Apiaceae    | <i>Pastinaca sativa</i> L.                                                    | Parsnip (zanahoria blanca)                  | Cu                               | h           | edi | 1.5                           | 0.7                                  |                | X             | X                   | X                |                |               |                     |                  |
| Apiaceae    | <i>Petroselinum crispum</i> (Mill.) A.W. Hill                                 | Parsley (perejil)                           | Cu                               | h           | edi | 5.5                           | 4.1                                  |                | X             | X                   | X                | X              | X             | X                   | X                |
| Apocynaceae | <i>Allamanda cathartica</i> L.                                                | Yellowbell (campana de oro, copa de oro)    | Cu                               | v           | orn | 3.3                           | <0.1                                 |                | X             | X                   | X                |                | X             | X                   | X                |
| Apocynaceae | <i>Allamanda schottii</i> Pohl <sup>1</sup>                                   |                                             | Cu                               | sh          | orn |                               | nfs                                  |                |               |                     |                  |                |               |                     | X                |
| Apocynaceae | <i>Catharanthus roseus</i> (L.) G. Don                                        | Madagascar Periwinkle (chavelas)            | Es                               | h           | orn | 14.8                          | *17.0                                | X              | X             | X                   | X                | X              | X             | X                   | X                |
| Apocynaceae | <i>Mandevilla sanderi</i> (Hemsl.) Woodson <sup>1</sup>                       |                                             | Cu                               | ssh         | orn |                               | nfs                                  |                |               |                     |                  |                |               |                     | X                |
| Apocynaceae | <i>Nerium oleander</i> L.                                                     | Oleander (laurel, laurel de jardín, adelfa) | Cu                               | sh          | orn | 5.5                           | 4.9                                  | X              | X             | X                   | X                | X              | X             | X                   | X                |
| Apocynaceae | <i>Plumeria rubra</i> L.                                                      | Frangipani (flor de María)                  | Cu                               | t           | orn | 2.0                           | 1.7                                  |                | X             | X                   | X                |                |               | X                   | X                |
| Apocynaceae | <i>Tabernaemontana divaricata</i> (L.) R. Br. ex Roem. & Schult. <sup>1</sup> |                                             | Cu                               | sh          | orn | 0.9                           | 0.5                                  |                |               | X                   | X                |                |               | X                   | X                |
| Apocynaceae | <i>Thevetia peruviana</i> (Pers.) K. Schum.                                   | (jacapa)                                    | Cu                               | sh          | orn | 0.5                           | 0.1                                  |                | X             | X                   | X                |                |               |                     | X                |
| Araceae     | <i>Acorus gramineus</i> Aiton <sup>1</sup>                                    |                                             | Cu                               | h           | orn | 0.2                           | <0.1                                 |                |               | X                   |                  |                |               | X                   |                  |
| Araceae     | <i>Aglaonema commutatum</i> Schott                                            |                                             | Cu                               | h           | orn | 1.5                           | 2.7                                  |                |               | X                   | X                |                | X             | X                   | X                |
| Araceae     | <i>Alocasia cucullata</i> (Lour.) G. Don. <sup>1</sup>                        |                                             | Cu                               | h           | orn |                               | 0.1                                  |                |               |                     |                  |                |               | X                   |                  |
| Araceae     | <i>Alocasia macrorrhizos</i> (L.) G. Don.                                     | (camacho)                                   | Cu                               | h           | orn | 1.8                           | 1.5                                  |                | X             | X                   | X                |                | X             | X                   | X                |
| Araceae     | <i>Alocasia micholitziana</i> Sander <sup>1</sup>                             |                                             | Cu                               | h           | orn | 0.2                           | 1.0                                  |                |               | X                   |                  |                |               | X                   |                  |
| Araceae     | <i>Alocasia plumbea</i> Van Houtte <sup>1</sup>                               |                                             | Cu                               | h           | orn | 2.0                           | 0.1                                  |                |               | X                   | X                |                |               | X                   | X                |
| Araceae     | <i>Alocasia sanderiana</i> hort. ex W. Bull. <sup>1</sup>                     |                                             | Cu                               | h           | orn |                               | 0.1                                  |                |               |                     |                  |                |               | X                   |                  |
| Araceae     | <i>Anthurium andraeanum</i> Linden                                            |                                             | Cu                               | h           | orn | 2.4                           | 1.2                                  |                |               | X                   | X                |                |               | X                   | X                |
| Araceae     | <i>Caladium bicolor</i> (Aiton) Vent.                                         | Elephant's Ears (corazón de Jesús)          | Cu                               | h           | orn | 5.5                           | 5.2                                  |                | X             | X                   | X                | X              | X             | X                   | X                |
| Araceae     | <i>Caladium humboldtii</i> Schott <sup>1</sup>                                |                                             | Cu                               | h           | orn |                               | 0.6                                  |                |               |                     |                  |                |               | X                   |                  |
| Araceae     | <i>Colocasia esculenta</i> (L.) Schott                                        | Taro, Dasheen (papa china, taro)            | Es                               | h           | edi | 12.6                          | 0.3                                  | X              | X             | X                   | X                |                |               | X                   | X                |
| Araceae     | <i>Dieffenbachia seguine</i> (Jacq.) Schott <sup>1</sup>                      | Dumb Cane (millonaria, chucha)              | Cu                               | h           | orn | 9.9                           | 9.9                                  |                | X             | X                   | X                | X              | X             | X                   | X                |

| Family           | Species name                                                                | Common name English (local-Spanish) | Introduction status in Galapagos | Growth form | Use | % of visited rural properties | % of fully surveyed urban properties | Floreana_rural | Isabela_rural | San Cristobal_rural | Santa Cruz_rural | Floreana_urban | Isabela_urban | San Cristobal_urban | Santa Cruz_urban |
|------------------|-----------------------------------------------------------------------------|-------------------------------------|----------------------------------|-------------|-----|-------------------------------|--------------------------------------|----------------|---------------|---------------------|------------------|----------------|---------------|---------------------|------------------|
| Araceae          | <i>Epipremnum pinnatum</i> (L.) Engl.                                       | (enredadera, cortina)               | Cu                               | v           | orn | 3.3                           | 2.4                                  | X              | X             | X                   | X                | X              | X             | X                   | X                |
| Araceae          | <i>Monstera adansonii</i> var. <i>laniata</i> (Schott) Madison <sup>1</sup> |                                     | Cu                               | v           | orn |                               | 0.1                                  |                |               |                     |                  |                |               |                     | X                |
| Araceae          | <i>Monstera deliciosa</i> Liebm.                                            | (costilla de Adán)                  | Cu                               | v           | orn | 0.4                           | <0.1                                 |                |               | X                   | X                |                |               | X                   | X                |
| Araceae          | <i>Monstera obliqua</i> Miq. <sup>1</sup>                                   |                                     | Cu                               | h           | orn | 0.2                           | 1.0                                  |                |               | X                   |                  | X              |               | X                   | X                |
| Araceae          | <i>Philodendron bipinnatifidum</i> Schott ex Endl. <sup>1</sup>             | (costilla de Adán)                  | Cu                               | h           | orn | 0.7                           | 0.8                                  |                |               | X                   | X                |                |               | X                   | X                |
| Araceae          | <i>Philodendron erubescens</i> K. Koch & Augustin <sup>1</sup>              |                                     | Cu                               | v           | orn | 0.5                           | 1.6                                  |                |               | X                   | X                |                |               | X                   | X                |
| Araceae          | <i>Philodendron</i> sp. <sup>1</sup>                                        |                                     | Cu                               | v           | orn |                               | nfs                                  |                |               |                     |                  |                |               |                     | X                |
| Araceae          | <i>Spathiphyllum wallisii</i> Regel <sup>1</sup>                            |                                     | Cu                               | h           | orn | 0.7                           | 0.3                                  |                |               | X                   | X                |                |               | X                   | X                |
| Araceae          | <i>Syngonium podophyllum</i> Schott <sup>1</sup>                            |                                     | Cu                               | v           | orn | 3.7                           | 4.4                                  |                | X             | X                   | X                |                | X             | X                   | X                |
| Araceae          | <i>Syngonium wendlandii</i> Schott <sup>1</sup>                             |                                     | Cu                               | h           | orn |                               | <0.1                                 |                |               |                     |                  |                |               | X                   |                  |
| Araceae          | <i>Xanthosoma robustum</i> Schott.                                          |                                     | Cu                               | h           | orn | 4.9                           | 0.2                                  |                |               | X                   |                  |                |               | X                   | X                |
| Araceae          | <i>Xanthosoma sagittifolium</i> (L.) Schott                                 | (otoy)                              | Es                               | h           | orn | 30.4                          | 1.0                                  | X              | X             | X                   | X                |                | X             | X                   | X                |
| Araceae          | <i>Zantedeschia aethiopica</i> (L.) Spreng. <sup>1</sup>                    | (cartucho)                          | Cu                               | h           | orn | 0.2                           | 0.1                                  |                | X             |                     |                  |                | X             | X                   |                  |
| Araliaceae       | <i>Polyscias cumingiana</i> (C. Presl.) Fern.-Vill. <sup>1</sup>            |                                     | Cu                               | sh          | orn | 0.2                           | 0.6                                  |                |               |                     | X                |                |               | X                   | X                |
| Araliaceae       | <i>Polyscias fruticosa</i> (L.) Harms                                       | (cola de iguana)                    | Cu                               | sh          | orn | 0.2                           | 0.2                                  |                |               |                     | X                |                |               | X                   | X                |
| Araliaceae       | <i>Polyscias guilfoylei</i> (W. Bull.) L.H. Bailey <sup>1</sup>             |                                     | Cu                               | sh          | orn | 6.8                           | 3.2                                  |                | X             | X                   | X                | X              | X             | X                   | X                |
| Araliaceae       | <i>Polyscias scutellaria</i> Burm. f.) Fosberg <sup>1</sup>                 |                                     | Cu                               | sh          | orn | 1.3                           | 1.5                                  |                | X             | X                   | X                |                | X             | X                   | X                |
| Araliaceae       | <i>Schefflera actinophylla</i> (Endl.) Harms <sup>1</sup>                   | (cheflera)                          | Cu                               | t           | orn | 0.2                           | 0.1                                  |                |               |                     | X                |                |               |                     | X                |
| Araliaceae       | <i>Schefflera arboricola</i> Hayata                                         | (cheflera)                          | Cu                               | ssh         | orn | 0.9                           | 1.7                                  |                |               | X                   | X                |                | X             | X                   | X                |
| Araucariaceae    | <i>Araucaria heterophylla</i> (Salisb.) Franco <sup>1</sup>                 |                                     | Cu                               | t           | orn | 0.4                           |                                      |                |               | X                   | X                |                |               | X                   |                  |
| Arecaceae        | <i>Bactris gasipaes</i> Kunth <sup>1</sup>                                  | (palmito)                           | Cu                               | t           | edi | 0.2                           |                                      |                | X             |                     |                  |                |               |                     |                  |
| Arecaceae        | <i>Caryota mitis</i> Lour. <sup>1</sup>                                     |                                     | Cu                               | t           | orn | 0.2                           |                                      |                |               |                     | X                |                |               |                     |                  |
| Arecaceae        | <i>Cocos nucifera</i> L.                                                    | (coco, palma)                       | Cu                               | t           | orn | 19.2                          | *20.4                                | X              | X             | X                   | X                | X              | X             | X                   | X                |
| Arecaceae        | <i>Dypsis lutescens</i> (H. Wendl.) Beentje & J. Dransf.                    | Golden Cane Palm (palma enana)      | Cu                               | t           | orn | 0.9                           | 2.1                                  |                | X             | X                   | X                |                | X             | X                   | X                |
| Arecaceae        | <i>Elaeis guineensis</i> Jacq.                                              | (palma africana)                    | Cu                               | t           | orn | 0.2                           |                                      |                |               |                     | X                |                |               |                     |                  |
| Arecaceae        | <i>Phoenix dactylifera</i> L.                                               | Date Palm (dátil)                   | Cu                               | t           | orn | 0.4                           | 0.2                                  |                |               | X                   | X                |                | X             |                     | X                |
| Arecaceae        | <i>Phytelphas aequatorialis</i> Spruce                                      | (tagua)                             | Cu                               | t           | orn | 1.8                           |                                      |                |               | X                   | X                |                |               |                     |                  |
| Arecaceae        | <i>Pritchardia lanigera</i> Becc. <sup>1</sup>                              |                                     | Cu                               | t           | orn | 0.5                           | 0.2                                  |                |               | X                   | X                |                | X             | X                   | X                |
| Arecaceae        | <i>Ptychosperma elegans</i> (R. Br.) Blume <sup>1</sup>                     |                                     | Cu                               | t           | orn | 1.8                           | 1.0                                  | X              | X             | X                   | X                |                | X             | X                   | X                |
| Arecaceae        | <i>Roystonea regia</i> (Kunth) O.F. Cook <sup>1</sup>                       | Royal Palm (palma real)             | Cu                               | t           | orn | 0.9                           | 0.2                                  |                | X             |                     |                  |                | X             | X                   | X                |
| Arecaceae        | <i>Veitchia merrillii</i> (Becc.) H.E. Moore <sup>1</sup>                   |                                     | Cu                               | t           | orn |                               | <0.1                                 |                |               |                     |                  |                |               | X                   |                  |
| Arecaceae        | <i>Washingtonia robusta</i> H. Wendl. <sup>1</sup>                          |                                     | Cu                               | t           | orn | 0.4                           | 0.2                                  |                |               |                     | X                |                |               | X                   | X                |
| Aristolochiaceae | <i>Aristolochia odoratissima</i> L.                                         | (Zaragoza)                          | Es                               | v           | med | 0.4                           | <0.1                                 |                |               |                     | X                |                |               |                     | X                |
| Asclepiadaceae   | <i>Asclepias curassavica</i> L.                                             | (mata caballo)                      | Es                               | h           | orn | 21.2                          | 0.1                                  | X              | X             | X                   |                  |                |               | X                   | X                |

| Family         | Species name                                                        | Common name English (local-Spanish) | Introduction status in Galapagos | Growth form | Use | % of visited rural properties | % of fully surveyed urban properties | Floreana_rural | Isabela_rural | San Cristobal_rural | Santa Cruz_rural | Floreana_urban | Isabela_urban | San Cristobal_urban | Santa Cruz_urban |
|----------------|---------------------------------------------------------------------|-------------------------------------|----------------------------------|-------------|-----|-------------------------------|--------------------------------------|----------------|---------------|---------------------|------------------|----------------|---------------|---------------------|------------------|
| Asclepiadaceae | <i>Caralluma hesperidum</i> Maire <sup>1</sup>                      | (pata de langosta)                  | Cu                               | s           | orn | 0.2                           | 0.1                                  | X              |               |                     |                  |                | X             | X                   |                  |
| Asclepiadaceae | <i>Cryptostegia grandiflora</i> (Roxb.) R. Br. <sup>1</sup>         | (caucho de la India)                | Cu                               | v           | orn |                               | <0.1                                 |                |               |                     |                  |                |               |                     | X                |
| Asclepiadaceae | <i>Hoya carnososa</i> (L. f.) R. Br.                                | (hoja de cera)                      | Cu                               | s           | orn | 0.5                           | 0.6                                  | X              | X             | X                   | X                | X              | X             | X                   | X                |
| Asclepiadaceae | <i>Huernia aspera</i> N.E. Br. <sup>1</sup>                         |                                     | Cu                               | s           | orn | 0.9                           | 1.8                                  | X              | X             |                     |                  | X              | X             | X                   | X                |
| Asclepiadaceae | <i>Stapelia gigantea</i> N.E. Br. <sup>1</sup>                      |                                     | Cu                               | s           | orn |                               | 0.1                                  |                |               |                     |                  |                |               | X                   | X                |
| Asparagaceae   | <i>Asparagus densiflorus</i> (Kunth) Jessop <sup>1</sup>            | Foxtail fern                        | Es                               | v           | orn | 0.4                           | 0.6                                  |                |               |                     | X                |                | X             | X                   | X                |
| Asparagaceae   | <i>Asparagus officinalis</i> L.                                     | (espárrago)                         | Cu                               | v           | orn | 0.2                           | <0.1                                 |                | X             |                     |                  |                |               |                     | X                |
| Asparagaceae   | <i>Asparagus setaceus</i> (Kunth) Jessop                            | Asparagus Fern (crestón)            | Es                               | v           | orn | 1.5                           | 2.6                                  | X              | X             | X                   | X                | X              | X             | X                   | X                |
| Asphodelaceae  | <i>Aloe arborescens</i> Mill. <sup>1</sup>                          | (sábila de Castilla)                | Cu                               | s           | orn | 0.4                           | 0.8                                  |                |               |                     | X                |                | X             | X                   | X                |
| Asphodelaceae  | <i>Aloe aristata</i> Haw. <sup>1</sup>                              |                                     | Cu                               | s           | orn | 0.5                           | 0.3                                  |                | X             | X                   |                  |                |               | X                   | X                |
| Asphodelaceae  | <i>Aloe cooperi</i> Baker <sup>1</sup>                              |                                     | Cu                               | s           | orn |                               | <0.1                                 |                |               |                     |                  |                | X             |                     |                  |
| Asphodelaceae  | <i>Aloe vera</i> (L.) Burm. f.                                      | (sábila)                            | Cu                               | s           | med | 19.2                          | *29.6                                | X              | X             | X                   | X                | X              | X             | X                   | X                |
| Asphodelaceae  | <i>Haworthia attenuata</i> (Haw.) Haw. <sup>1</sup>                 |                                     | Cu                               | s           | orn | 0.4                           | 0.1                                  |                | X             |                     |                  |                | X             |                     | X                |
| Asteliaceae    | <i>Cordyline fruticosa</i> (L.) A. Chev.                            |                                     | Cu                               | sh          | orn | 4.6                           | 2.3                                  | X              | X             | X                   |                  |                | X             | X                   | X                |
| Asteraceae     | <i>Achillea millefolium</i> L. <sup>1</sup>                         | Yarrow                              | Es                               | h           | orn | 0.5                           | 0.1                                  |                | X             | X                   |                  |                | X             | X                   | X                |
| Asteraceae     | <i>Acmella ciliata</i> (HBK) Cassini                                |                                     | AcQ                              | h           | non | 0.4                           |                                      |                | X             | X                   |                  |                |               |                     |                  |
| Asteraceae     | <i>Acmella sodiroi</i> (Hieron.) R.K. Jansen                        |                                     | AcQ                              | h           | non | 1.5                           | <0.1                                 |                | X             | X                   |                  |                |               |                     | X                |
| Asteraceae     | <i>Adenostemma platyphyllum</i> Cass.                               | (mama Juana, tía Juana)             | Es                               | h           | non | 19.4                          | 0.2                                  | X              | X             | X                   |                  |                |               | X                   | X                |
| Asteraceae     | <i>Ambrosia arborescens</i> Mill. <sup>1</sup>                      | (altamisa)                          | Cu                               | ssh         | med | 0.4                           |                                      | X              |               |                     |                  |                |               |                     |                  |
| Asteraceae     | <i>Ambrosia peruviana</i> Willd.                                    |                                     | Ac                               | h           | med | 0.9                           | 0.1                                  |                |               | X                   |                  |                |               | X                   |                  |
| Asteraceae     | <i>Bidens cynapiifolia</i> Kunth                                    |                                     | Ac                               | h           | non | 0.4                           |                                      |                | X             |                     |                  |                |               |                     |                  |
| Asteraceae     | <i>Bidens pilosa</i> L.                                             | (amor seco)                         | NaQ                              | h           | non | 44.0                          | 2.9                                  | X              | X             | X                   | X                |                | X             | X                   | X                |
| Asteraceae     | <i>Blumea viscosa</i> (Mill.) V.M. Badillo <sup>1</sup>             |                                     | Ac                               | h           | non | 0.2                           | 0.5                                  | X              |               |                     |                  |                | X             |                     | X                |
| Asteraceae     | <i>Centratherum punctatum</i> Cass.                                 |                                     | Es                               | h           | orn | 28.4                          | 0.6                                  | X              | X             |                     |                  |                | X             | X                   | X                |
| Asteraceae     | <i>Chrysanthemum coronarium</i> L. <sup>1</sup>                     |                                     | Cu                               | h           | orn | 0.5                           | 0.1                                  | X              | X             |                     |                  |                |               | X                   |                  |
| Asteraceae     | <i>Conyza bonariensis</i> (L.) Cronquist                            |                                     | Ac                               | h           | non | 9.0                           | <0.1                                 | X              | X             | X                   | X                |                | X             |                     |                  |
| Asteraceae     | <i>Conyza canadensis</i> (L.) Cronquist                             |                                     | Ac                               | h           | non | 29.7                          | <0.1                                 | X              | X             | X                   |                  |                | X             |                     |                  |
| Asteraceae     | <i>Cosmos bipinnatus</i> Cav.                                       |                                     | Cu                               | h           | orn |                               | nfs                                  |                |               |                     |                  |                |               |                     | X                |
| Asteraceae     | <i>Cyanthillium cinereum</i> (L.) H. Rob.                           |                                     | AcQ                              | h           | non | 10.3                          | 2.7                                  | X              | X             |                     |                  |                | X             | X                   | X                |
| Asteraceae     | <i>Cynara cardunculus</i> L.                                        | Artichoke (alcachofa)               | Cu                               | h           | med | 0.4                           |                                      |                | X             |                     |                  |                |               |                     |                  |
| Asteraceae     | <i>Dahlia pinnata</i> Cav.                                          | Dahlia (dalia)                      | Cu                               | h           | orn | 5.3                           | 1.1                                  | X              | X             | X                   | X                | X              | X             | X                   | X                |
| Asteraceae     | <i>Dendranthema indicum</i> (L.) Des Moul. <sup>1</sup>             |                                     | Cu                               | h           | orn | 0.2                           | <0.1                                 | X              |               |                     |                  |                |               | X                   |                  |
| Asteraceae     | <i>Dendranthema x grandiflorum</i> cv peggy Stevens (Ramat.) Kitam. | Chrysanthemum (pomo)                | Cu                               | h           | orn | 1.8                           | 2.5                                  | X              | X             |                     |                  |                | X             | X                   | X                |
| Asteraceae     | <i>Elephantopus mollis</i> Kunth <sup>1</sup>                       |                                     | Ac                               | h           | non | 10.8                          |                                      |                | X             |                     |                  |                |               |                     |                  |
| Asteraceae     | <i>Emilia sonchifolia</i> (L.) D.C. <sup>1</sup>                    |                                     | Ac                               | h           | non |                               | <0.1                                 |                |               |                     |                  |                |               | X                   |                  |

| Family        | Species name                                                                         | Common name English (local-Spanish)                       | Introduction status in Galapagos | Growth form | Use | % of visited rural properties | % of fully surveyed urban properties | Floreana_rural | Isabela_rural | San Cristobal_rural | Santa Cruz_rural | Floreana_urban | Isabela_urban | San Cristobal_urban | Santa Cruz_urban |
|---------------|--------------------------------------------------------------------------------------|-----------------------------------------------------------|----------------------------------|-------------|-----|-------------------------------|--------------------------------------|----------------|---------------|---------------------|------------------|----------------|---------------|---------------------|------------------|
| Asteraceae    | <i>Erechtites hieraciifolius</i> var. <i>cacalioides</i> (Fisch. ex Spreng.) Griseb. |                                                           | Ac                               | h           | non | 14.8                          | <0.1                                 |                | X             | X                   |                  |                |               | X                   |                  |
| Asteraceae    | <i>Galinsoga quadriradiata</i> Ruiz & Pav.                                           | (hierba de cuy)                                           | Ac                               | h           | non | 9.0                           |                                      | X              | X             | X                   | X                |                |               |                     |                  |
| Asteraceae    | <i>Gamochaeta purpurea</i> (L.) Cabrera                                              | (puscala)                                                 | NaQ                              | h           | non | 2.0                           |                                      |                | X             |                     |                  |                |               |                     |                  |
| Asteraceae    | <i>Gazania rigens</i> L. (Gaertn.)                                                   |                                                           | Cu                               | h           | orn | 0.4                           | 0.3                                  |                | X             | X                   |                  |                | X             | X                   |                  |
| Asteraceae    | <i>Helianthus annuus</i> L.                                                          | Sunflower (girasol)                                       | Cu                               | ssh         | orn | 1.6                           | 1.3                                  |                | X             | X                   | X                |                | X             | X                   | X                |
| Asteraceae    | <i>Koanophyllon solidaginoides</i> (Kunth) R.M. King & H. Rob.                       |                                                           | NaQ                              | h           | non | 3.5                           |                                      |                | X             | X                   |                  |                |               |                     |                  |
| Asteraceae    | <i>Lactuca sativa</i> L.                                                             | Lettuce (lechuga)                                         | Cu                               | h           | edi | 7.0                           | 0.2                                  | X              | X             | X                   | X                |                |               | X                   | X                |
| Asteraceae    | <i>Matricaria recutita</i> L.                                                        | Chamomile (manzanilla)                                    | Cu                               | h           | med | 2.9                           | 0.1                                  |                | X             | X                   | X                | X              | X             | X                   | X                |
| Asteraceae    | <i>Porophyllum ruderale</i> ssp. <i>macrocephalum</i> (DC.) R.R. Johnson             | (ruda gallinazo)                                          | Ac                               | h           | non | 4.4                           | 5.9                                  |                | X             | X                   | X                | X              | X             | X                   | X                |
| Asteraceae    | <i>Pseudelephantopus spicatus</i> (B. Juss. ex Aubl.) C.F. Baker                     |                                                           | Ac                               | h           | non | 2.7                           | 0.1                                  | X              |               | X                   |                  | X              |               |                     |                  |
| Asteraceae    | <i>Pseudelephantopus spiralis</i> (Less.) Cronquist                                  |                                                           | Ac                               | h           | non | 65.2                          | 0.3                                  |                | X             | X                   | X                |                |               | X                   | X                |
| Asteraceae    | <i>Pseudogynoxys scabra</i> (Benth.) Cuatrec.                                        | (San Juan)                                                | Cu                               | v           | orn | 0.2                           | <0.1                                 |                |               | X                   |                  |                |               |                     | X                |
| Asteraceae    | <i>Senecio macroglossus</i> DC.                                                      |                                                           | Cu                               | v           | orn | 0.2                           | 0.2                                  |                |               |                     | X                |                |               | X                   | X                |
| Asteraceae    | <i>Smallanthus sonchifolius</i> (Poepp.) H. Rob.                                     | (jicama)                                                  | Cu                               | ssh         | edi | 0.7                           | <0.1                                 |                | X             | X                   | X                |                |               | X                   |                  |
| Asteraceae    | <i>Sonchus oleraceus</i> L.                                                          |                                                           | Ac                               | h           | non | 31.3                          | 0.4                                  | X              | X             | X                   | X                |                |               | X                   | X                |
| Asteraceae    | <i>Synedrella nodiflora</i> (L.) Gaertn.                                             |                                                           | Ac                               | h           | non | *77.8                         | 2.2                                  | X              | X             | X                   | X                | X              | X             | X                   | X                |
| Asteraceae    | <i>Tagetes erecta</i> L.                                                             | (flor de muerto, arrayosa, sintzo)                        | Cu                               | h           | orn | 7.9                           | 2.6                                  | X              | X             | X                   | X                | X              | X             | X                   | X                |
| Asteraceae    | <i>Tanacetum parthenium</i> (L.) Sch. Bip.                                           | Feverfew (Santa María)                                    | Cu                               | h           | med | 0.2                           |                                      |                |               |                     | X                |                |               |                     |                  |
| Asteraceae    | <i>Taraxacum officinale</i> Weber                                                    | Dandelion (taraxaco, diente de león)                      | AcQ                              | h           | med | 2.2                           | 0.4                                  | X              | X             | X                   | X                | X              | X             | X                   | X                |
| Asteraceae    | <i>Tithonia diversifolia</i> (Hemsl.) A. Gray                                        | (jicama)                                                  | Es                               | ssh         | orn | 0.4                           |                                      |                |               | X                   | X                |                |               |                     |                  |
| Asteraceae    | <i>Zinnia peruviana</i> (L.) L.                                                      |                                                           | Es                               | h           | orn | 2.0                           | 1.7                                  |                |               | X                   | X                |                |               | X                   | X                |
| Balsaminaceae | <i>Impatiens balsamina</i> L.                                                        | (mirame lindo)                                            | Es                               | h           | orn | 4.8                           | 1.5                                  |                | X             | X                   | X                |                |               | X                   | X                |
| Balsaminaceae | <i>Impatiens walleriana</i> Hook. f.                                                 | (mirame lindo)                                            | Es                               | h           | orn | 6.6                           | 4.4                                  |                | X             | X                   | X                |                |               | X                   | X                |
| Begoniaceae   | <i>Begonia</i> "aya"                                                                 | Begonia (begonia)                                         | Cu                               | h           | orn | 0.4                           | 0.2                                  |                |               | X                   |                  |                |               | X                   |                  |
| Begoniaceae   | <i>Begonia</i> "haageana"                                                            | Begonia (begonia)                                         | Cu                               | h           | orn | 0.4                           |                                      |                |               | X                   | X                |                |               |                     |                  |
| Begoniaceae   | <i>Begonia dichroa</i> Sprague                                                       | Begonia (begonia)                                         | Cu                               | h           | orn | 3.5                           | 2.4                                  |                | X             | X                   | X                |                |               | X                   | X                |
| Begoniaceae   | <i>Begonia rex</i> Putz.                                                             | King begonia, painted-leaf begonia, begonia rex (begonia) | Cu                               | h           | orn | 2.2                           | 0.9                                  |                |               | X                   | X                |                |               | X                   | X                |
| Begoniaceae   | <i>Begonia semperflorens</i> Link & Otto                                             | Bedding begonia, wax                                      | Cu                               | h           | orn | 3.3                           | 2.3                                  |                |               | X                   | X                | X              |               | X                   | X                |

| Family       | Species name                                                              | Common name English (local-Spanish)                   | Introduction status in Galapagos | Growth form | Use | % of visited rural properties | % of fully surveyed urban properties | Floreana_rural | Isabela_rural | San Cristobal_rural | Santa Cruz_rural | Floreana_urban | Isabela_urban | San Cristobal_urban | Santa Cruz_urban |
|--------------|---------------------------------------------------------------------------|-------------------------------------------------------|----------------------------------|-------------|-----|-------------------------------|--------------------------------------|----------------|---------------|---------------------|------------------|----------------|---------------|---------------------|------------------|
|              |                                                                           | begonia (begonia)                                     |                                  |             |     |                               |                                      |                |               |                     |                  |                |               |                     |                  |
| Begoniaceae  | <i>Begonia x erythrophylla</i> Neumann <sup>1</sup>                       | Begonia (begonia)                                     | Cu                               | h           | orn |                               | 0.1                                  |                |               |                     |                  |                |               |                     | X                |
| Betulaceae   | <i>Betula cf. alleghaniensis</i> Britton <sup>1</sup>                     |                                                       | Cu                               | t           | orn | 0.2                           |                                      |                |               |                     | X                |                |               |                     |                  |
| Bignoniaceae | <i>Crescentia cujete</i> L.                                               | Calabash Tree (calabasa, botote pilche, mate, botote) | Cu                               | sh          | oth | 6.0                           | 0.1                                  |                | X             | X                   |                  |                |               | X                   |                  |
| Bignoniaceae | <i>Jacaranda mimosifolia</i> D. Don <sup>1</sup>                          | Jacaranda (acacia celeste)                            | Cu                               | t           | orn | 0.7                           | 0.1                                  |                |               | X                   | X                |                |               | X                   | X                |
| Bignoniaceae | <i>Mansoa standleyi</i> (Steyrm.) A.H. Gentry                             | (palo de ajo)                                         | Cu                               | v           | edi | 0.2                           |                                      |                |               |                     | X                |                |               |                     |                  |
| Bignoniaceae | <i>Spathodea campanulata</i> P. Beauv.                                    | African Tulip Tree (tulipán africano)                 | Cu                               | t           | orn | 0.2                           | <0.1                                 |                |               |                     | X                |                |               | X                   |                  |
| Bixaceae     | <i>Bixa orellana</i> L.                                                   | Annatto (achiote)                                     | Es                               | sh          | edi | 26.4                          | 0.2                                  | X              | X             | X                   | X                | X              |               | X                   | X                |
| Bixaceae     | <i>Cochlospermum vitifolium</i> (Willd.) Spreng.                          | (bototillo, capo)                                     | Cu                               | t           | orn | 1.3                           |                                      |                | X             |                     |                  |                |               |                     |                  |
| Bombacaceae  | <i>Ceiba pentandra</i> (L.) Gaertn.                                       | Cotton Tree (ceibo)                                   | Cu                               | t           | orn | 3.5                           | 0.1                                  |                | X             | X                   | X                |                | X             | X                   |                  |
| Bombacaceae  | <i>Matisia cordata</i> Bonpl.                                             | (zapote)                                              | Cu                               | t           | edi | 12.1                          |                                      |                | X             | X                   | X                |                |               |                     |                  |
| Bombacaceae  | <i>Ochroma pyramidale</i> (Cav. ex Lam.) Urban                            | Balsa (balsa)                                         | Es                               | t           | tim | 11.4                          | 0.1                                  |                | X             | X                   | X                |                |               | X                   |                  |
| Boraginaceae | <i>Borago officinalis</i> L. <sup>1</sup>                                 | Borage (borraja, suelda-suelda)                       | Cu                               | h           | med | 0.4                           |                                      |                | X             | X                   |                  |                |               |                     |                  |
| Boraginaceae | <i>Cordia alliodora</i> (Ruiz & Pav.) Oken                                | (laurel)                                              | Es                               | t           | oth | 5.9                           |                                      | X              | X             | X                   | X                |                |               |                     |                  |
| Boraginaceae | <i>Heliotropium rufipilum</i> var. <i>rufipilum</i> (Benth.) I.M. Johnst. |                                                       | AcQ                              | sh          | non | 0.2                           |                                      |                |               |                     | X                |                |               |                     |                  |
| Brassicaceae | <i>Brassica juncea</i> (L.) Coss.                                         |                                                       | Cu                               | h           | edi | 0.2                           |                                      |                |               | X                   |                  |                |               |                     |                  |
| Brassicaceae | <i>Brassica napus</i> L.                                                  | Oilseed Rape, turnip (nabo)                           | Es                               | h           | edi | 10.3                          | 0.4                                  | X              | X             | X                   | X                | X              | X             | X                   | X                |
| Brassicaceae | <i>Brassica oleracea</i> var. <i>botrytis</i> L.                          | Cauliflower (coliflor)                                | Cu                               | h           | edi | 4.0                           | 0.1                                  | X              | X             | X                   | X                |                | X             |                     | X                |
| Brassicaceae | <i>Brassica oleracea</i> var. <i>capitata</i> L.                          | Cabbage (col, col morada)                             | Cu                               | h           | edi | 12.5                          | 0.6                                  | X              | X             | X                   | X                |                | X             | X                   | X                |
| Brassicaceae | <i>Brassica oleracea</i> var. <i>gemmifer</i> (DC.) Zenker                | Brussels Sprout (col de Bruselas)                     | Cu                               | h           | edi | 0.2                           |                                      |                |               | X                   |                  |                |               |                     |                  |
| Brassicaceae | <i>Brassica oleracea</i> var. <i>italica</i> Plenck                       | Broccoli (brócoli)                                    | Cu                               | h           | edi | 4.9                           | 0.1                                  |                | X             | X                   | X                |                | X             |                     | X                |
| Brassicaceae | <i>Brassica rapa</i> L.                                                   | (nabo chino)                                          | Es                               | h           | non | 20.9                          | 0.5                                  | X              | X             | X                   | X                |                | X             | X                   | X                |
| Brassicaceae | <i>Capsella bursa-pastoris</i> (L.) Medik.                                |                                                       | Ac                               | h           | non | 2.4                           |                                      | X              | X             | X                   | X                |                |               |                     |                  |
| Brassicaceae | <i>Cardamine bonariensis</i> Pers.                                        | (berro)                                               | Es                               | h           | non | 3.1                           | 0.1                                  |                | X             | X                   | X                |                |               |                     | X                |
| Brassicaceae | <i>Coronopus didymus</i> (L.) J.E. Sm.                                    | Lesser Swine-cress (mastuerzo)                        | Ac                               | h           | non | 9.7                           | 0.1                                  | X              | X             | X                   | X                |                | X             |                     | X                |
| Brassicaceae | <i>Lepidium sativum</i> L.                                                |                                                       | Cu                               | h           | non | 0.5                           |                                      |                | X             | X                   |                  |                |               |                     |                  |
| Brassicaceae | <i>Lepidium virginicum</i> L.                                             |                                                       | AcQ                              | h           | non | 23.1                          | 1.4                                  |                | X             | X                   |                  |                |               | X                   | X                |
| Brassicaceae | <i>Matthiola incana</i> (L.) R. Br. <sup>1</sup>                          |                                                       | Cu                               | h           | orn |                               | 0.1                                  |                |               |                     |                  |                | X             | X                   |                  |
| Brassicaceae | <i>Nasturtium officinale</i> R. Br.                                       |                                                       | Es                               | h           | orn | 0.4                           |                                      |                |               |                     | X                |                |               |                     |                  |
| Brassicaceae | <i>Raphanus sativus</i> L.                                                | Radish (rábano)                                       | Es                               | h           | edi | 6.8                           | 0.2                                  | X              | X             | X                   | X                |                | X             |                     | X                |

| Family       | Species name                                                                                       | Common name English (local-Spanish)      | Introduction status in Galapagos | Growth form | Use | % of visited rural properties | % of fully surveyed urban properties | Floreana_rural | Isabela_rural | San Cristobal_rural | Santa Cruz_rural | Floreana_urban | Isabela_urban | San Cristobal_urban | Santa Cruz_urban |
|--------------|----------------------------------------------------------------------------------------------------|------------------------------------------|----------------------------------|-------------|-----|-------------------------------|--------------------------------------|----------------|---------------|---------------------|------------------|----------------|---------------|---------------------|------------------|
| Bromeliaceae | <i>Ananas comosus</i> (L.) Merr.                                                                   | Pineapple (piña)                         | Cu                               | s           | edi | 28.2                          | 0.9                                  | X              | X             | X                   | X                | X              | X             | X                   | X                |
| Bromeliaceae | <i>Bromelia pinguin</i> L.                                                                         | (piñuela)                                | Cu                               | s           | oth | 4.4                           |                                      |                | X             | X                   | X                |                |               |                     |                  |
| Bromeliaceae | <i>Cryptanthus sinuosus</i> L.B. Sm. <sup>1</sup>                                                  |                                          | Cu                               | s           | orn |                               | nfs                                  |                |               |                     |                  |                |               |                     | X                |
| Bromeliaceae | <i>Neoregelia carolinae</i> fo. <i>tricolor</i> (M.B. Foster) M.B. Foster ex L.B. Sm. <sup>1</sup> |                                          | Cu                               | h           | orn | 0.4                           | nfs                                  |                |               | X                   | X                |                |               |                     | X                |
| Bromeliaceae | <i>Tillandsia cf. pretiosa</i> Mez <sup>1</sup>                                                    | (huaicundo)                              | Cu                               | h           | orn | 0.4                           |                                      |                |               | X                   |                  |                |               |                     |                  |
| Bromeliaceae | <i>Tillandsia cyanea</i> Linden ex K. Koch <sup>1</sup>                                            | (huaicundo)                              | Cu                               | h           | orn | 0.2                           |                                      |                |               | X                   |                  |                |               |                     |                  |
| Buddlejaceae | <i>Buddleja davidii</i> Franch. <sup>1</sup>                                                       |                                          | Cu                               | sh          | orn | 0.2                           |                                      |                |               |                     | X                |                |               |                     |                  |
| Cactaceae    | <i>Brasilopuntia brasiliensis</i> (Willd.) Haw.                                                    |                                          | Cu                               | s           | orn | 1.3                           | 1.0                                  |                | X             | X                   | X                |                | X             | X                   | X                |
| Cactaceae    | <i>Cereus peruvianus</i> var. 1 (L.) J.S. Muell.                                                   |                                          | Cu                               | s           | orn | 2.4                           | 7.5                                  |                | X             | X                   | X                |                | X             | X                   | X                |
| Cactaceae    | <i>Cereus peruvianus</i> var. <i>monstrosus</i> DC.                                                |                                          | Cu                               | s           | orn | 0.7                           | 0.5                                  |                |               | X                   | X                |                | X             | X                   | X                |
| Cactaceae    | <i>Cleistocactus</i> sp. 1                                                                         |                                          | Cu                               | s           | orn | 0.5                           | 0.1                                  |                | X             | X                   | X                |                |               |                     | X                |
| Cactaceae    | <i>Disocactus flagelliformis</i> (L.) Barthlott                                                    | (flor de látigo, floricuerno, nopalillo) | Cu                               | s           | orn |                               | 0.2                                  |                |               |                     |                  |                |               | X                   | X                |
| Cactaceae    | <i>Disocactus</i> sp. 1                                                                            | (nopalillo)                              | Cu                               | s           | orn |                               | nfs                                  |                |               |                     |                  |                |               |                     | X                |
| Cactaceae    | <i>Echinocactus</i> sp. 1                                                                          |                                          | Cu                               | s           | orn | 0.2                           |                                      |                |               |                     | X                |                |               |                     |                  |
| Cactaceae    | <i>Echinopsis calochlora</i> K. Schum.                                                             |                                          | Cu                               | s           | orn | 0.4                           | 0.5                                  |                |               | X                   | X                |                |               | X                   | X                |
| Cactaceae    | <i>Echinopsis eyriesii</i> (Turpin) Zucc.                                                          |                                          | Cu                               | s           | orn | 0.2                           | 0.2                                  |                |               | X                   |                  |                | X             |                     | X                |
| Cactaceae    | <i>Echinopsis pachanoi</i> (Britton & Rose) Friedrich & G.D. Rowley                                |                                          | Cu                               | s           | orn |                               | 0.1                                  |                |               |                     |                  |                | X             |                     | X                |
| Cactaceae    | <i>Epiphyllum oxypetalum</i> (DC.) Haw.                                                            | (galán de noche, reina de la noche)      | Cu                               | s           | orn | 0.2                           | 1.1                                  |                | X             |                     |                  | X              | X             | X                   | X                |
| Cactaceae    | <i>Hatiora gaertneri</i> (Regel) Barthlott                                                         |                                          | Cu                               | s           | orn | 0.2                           | 0.1                                  |                |               |                     | X                |                |               | X                   | X                |
| Cactaceae    | <i>Hylocereus polyrhizus</i> (F.A.C. Weber) Britton & Rose                                         | (flor de cáliz)                          | Es                               | ssh         | orn | 1.3                           | 2.9                                  | X              | X             | X                   | X                | X              | X             | X                   | X                |
| Cactaceae    | <i>Mammillaria backebergiana</i> F.G. Buchenau                                                     |                                          | Cu                               | s           | orn |                               | 0.1                                  |                |               |                     |                  |                |               | X                   |                  |
| Cactaceae    | <i>Mammillaria candida</i> Scheidw.                                                                |                                          | Cu                               | s           | orn | 0.2                           | 0.2                                  |                |               |                     | X                |                |               | X                   | X                |
| Cactaceae    | <i>Mammillaria columbiana</i> Salm-Dyck                                                            |                                          | Cu                               | s           | orn |                               | 0.1                                  |                |               |                     |                  |                |               | X                   | X                |
| Cactaceae    | <i>Mammillaria prolifera</i> ssp. 1 (Mill.) Haw.                                                   | (el mundo)                               | Cu                               | s           | orn | 0.2                           | 0.2                                  |                |               | X                   |                  |                |               | X                   | X                |
| Cactaceae    | <i>Mammillaria prolifera</i> ssp. <i>texana</i> (Engelm.) Borg.                                    |                                          | Cu                               | s           | orn | 0.2                           | <0.1                                 |                |               | X                   |                  |                |               |                     | X                |
| Cactaceae    | <i>Mammillaria</i> sp. 1                                                                           |                                          | Cu                               | s           | orn |                               | <0.1                                 |                |               |                     |                  |                |               |                     | X                |
| Cactaceae    | <i>Opuntia cf. monacantha</i> ssp. <i>monacantha</i> (Willd.) Haw.                                 |                                          | Cu                               | s           | orn | 0.9                           | 1.9                                  |                |               | X                   |                  |                | X             | X                   | X                |
| Cactaceae    | <i>Opuntia cf. monacantha</i> var. <i>variegata</i> (Willd.) Haw.                                  |                                          | Cu                               | s           | orn |                               | 0.3                                  |                |               |                     |                  |                | X             |                     | X                |
| Cactaceae    | <i>Opuntia dillenii</i> (Ker Gawl.) Haw.                                                           |                                          | Cu                               | s           | orn | 1.3                           | 4.1                                  |                | X             |                     | X                |                | X             | X                   | X                |
| Cactaceae    | <i>Opuntia ficus-indica</i> (L.) Mill.                                                             |                                          | Es                               | s           | orn | 0.9                           | 2.8                                  |                |               | X                   |                  |                | X             | X                   | X                |
| Cactaceae    | <i>Opuntia microdasys</i> var. 1                                                                   |                                          | Cu                               | s           | orn | 0.7                           | 0.2                                  |                | X             | X                   | X                |                | X             |                     | X                |



| Family          | Species name                                                            | Common name English (local-Spanish)   | Introduction status in Galapagos | Growth form | Use | % of visited rural properties | % of fully surveyed urban properties | Floreana_rural | Isabela_rural | San Cristobal_rural | Santa Cruz_rural | Floreana_urban | Isabela_urban | San Cristobal_urban | Santa Cruz_urban |
|-----------------|-------------------------------------------------------------------------|---------------------------------------|----------------------------------|-------------|-----|-------------------------------|--------------------------------------|----------------|---------------|---------------------|------------------|----------------|---------------|---------------------|------------------|
|                 | (Lehm.) Pfeiff.                                                         |                                       |                                  |             |     |                               |                                      |                |               |                     |                  |                |               |                     |                  |
| Cactaceae       | <i>Opuntia microdasys</i> var. <i>albispina</i> Fobe                    |                                       | Cu                               | s           | orn |                               | 0.2                                  |                |               |                     |                  |                |               | X                   | X                |
| Cactaceae       | <i>Opuntia subulata</i> (Muehlenpf.) Engelm.                            |                                       | Cu                               | s           | orn |                               | 0.1                                  |                |               |                     |                  |                |               | X                   | X                |
| Cactaceae       | <i>Pereskia aculeata</i> Mill. <sup>1</sup>                             |                                       | Cu                               | s           | orn |                               | <0.1                                 |                |               |                     |                  |                |               |                     | X                |
| Cactaceae       | <i>Pereskia bleo</i> (Kunth) DC. <sup>1</sup>                           |                                       | Cu                               | s           | orn |                               | <0.1                                 |                |               |                     |                  |                |               | X                   | X                |
| Cactaceae       | <i>Schlumbergera truncata</i> (Haw.) Moran                              |                                       | Cu                               | s           | orn | 0.2                           | nfs                                  |                |               |                     | X                |                |               |                     | X                |
| Cactaceae       | <i>Selenicereus anthonyanus</i> (Alexander) D.R. Hunt                   |                                       | Cu                               | s           | orn |                               | 0.1                                  |                |               |                     |                  |                |               |                     | X                |
| Cactaceae       | <i>Selenicereus megalanthus</i> (Schumann ex Vaupel) Moran <sup>1</sup> | yellow pitaya (pitahaya amarilla)     | Cu                               | s           | orn | 0.2                           |                                      |                |               | X                   |                  |                |               |                     |                  |
| Caesalpiniaceae | <i>Bauhinia monandra</i> Kurz.                                          | Orchid Tree (orquidea del pobre)      | Cu                               | t           | orn | 3.7                           | 3.2                                  | X              | X             | X                   |                  | X              | X             | X                   | X                |
| Caesalpiniaceae | <i>Bauhinia</i> sp. 1                                                   |                                       | Cu                               | t           | orn |                               | 0.1                                  |                |               |                     |                  |                |               | X                   |                  |
| Caesalpiniaceae | <i>Caesalpinia bonduc</i> (L.) Roxb.                                    | (mora, chililica)                     | NaQ                              | sh          | non | 0.2                           | 0.3                                  |                |               |                     | X                |                | X             |                     |                  |
| Caesalpiniaceae | <i>Caesalpinia gilliesii</i> (Wall. ex Hook.) D. Dietr.                 |                                       | Cu                               | sh          | orn |                               | <0.1                                 |                |               |                     |                  | X              |               |                     |                  |
| Caesalpiniaceae | <i>Caesalpinia pulcherrima</i> (L.) Sw.                                 |                                       | Es                               | sh          | orn | 2.7                           | 2.8                                  |                | X             | X                   | X                | X              | X             | X                   | X                |
| Caesalpiniaceae | <i>Cassia fistula</i> L.                                                | (chorizo, cigarro)                    | Cu                               | t           | orn |                               | 0.3                                  |                |               |                     |                  |                |               | X                   | X                |
| Caesalpiniaceae | <i>Cassia grandis</i> L. f.                                             |                                       | Es                               | t           | non | 1.1                           |                                      |                |               | X                   |                  |                |               |                     |                  |
| Caesalpiniaceae | <i>Delonix regia</i> (Boger ex Hook.) Raf.                              | Flame Tree, Flamboyant (falsa acacia) | Es                               | t           | orn | 12.3                          | *17.9                                | X              | X             | X                   | X                | X              | X             | X                   | X                |
| Caesalpiniaceae | <i>Schizolobium parahyba</i> (Vell.) S.F. Blake                         | (pachaco)                             | Cu                               | t           | orn | 0.2                           |                                      |                |               |                     | X                |                |               |                     |                  |
| Caesalpiniaceae | <i>Senna alata</i> (L.) Roxb.                                           | (palo de abejón)                      | Es                               | ssh         | orn | 1.3                           | 1.5                                  |                | X             | X                   |                  |                | X             | X                   | X                |
| Caesalpiniaceae | <i>Senna bicapsularis</i> (L.) Roxb.                                    |                                       | Ac                               | ssh         | non |                               | 0.6                                  |                |               |                     |                  |                |               |                     | X                |
| Caesalpiniaceae | <i>Senna obtusifolia</i> (L.) H.S. Irwin & Barneby                      | (dormidera)                           | Ac                               | h           | non | 51.1                          | 9.6                                  | X              | X             | X                   |                  | X              | X             | X                   | X                |
| Caesalpiniaceae | <i>Senna septemtrionalis</i> (Viv.) H.S. Irwin & Barneby <sup>1</sup>   |                                       | Es                               | sh          | non | 1.6                           |                                      |                |               | X                   |                  |                |               |                     |                  |
| Caesalpiniaceae | <i>Senna siamea</i> (Lam.) H.S. Irwin & Barneby <sup>1</sup>            |                                       | Cu                               | t           | orn | 4.8                           | <0.1                                 |                | X             | X                   |                  |                |               | X                   | X                |
| Caesalpiniaceae | <i>Tamarindus indica</i> L.                                             | Tamarind (tamarindo)                  | Cu                               | t           | edi | 2.6                           | 3.3                                  |                | X             | X                   |                  | X              | X             | X                   | X                |
| Campanulaceae   | <i>Hippobroma longiflora</i> (L.) G. Don                                |                                       | Es                               | h           | non | 0.5                           | <0.1                                 |                |               | X                   |                  |                |               |                     | X                |
| Cannabaceae     | <i>Cannabis sativa</i> L. <sup>1</sup>                                  | Marijuana (marihuana)                 | Cu                               | h           | oth |                               | nfs                                  |                |               |                     |                  |                |               |                     | X                |
| Cannaceae       | <i>Canna indica</i> L.                                                  | Indian Shot (achira)                  | Cu                               | h           | oth | 10.4                          | 1.0                                  |                | X             | X                   | X                |                | X             | X                   | X                |
| Cannaceae       | <i>Canna x generalis</i> Bailey                                         | (atzera, platanillo)                  | Es                               | h           | oth | 2.9                           | 0.9                                  | X              | X             | X                   | X                | X              | X             | X                   | X                |
| Capparaceae     | <i>Cleome speciosa</i> Raf. <sup>1</sup>                                |                                       | Es                               | h           | orn | 0.2                           | nfs                                  |                |               |                     | X                |                |               |                     | X                |
| Capparaceae     | <i>Cleome spinosa</i> Jacq.                                             |                                       | Cu                               | h           | orn | 0.2                           | <0.1                                 |                |               |                     | X                |                |               | X                   |                  |
| Capparaceae     | <i>Cleome viscosa</i> L.                                                |                                       | Ac                               | h           | non |                               | 1.7                                  |                |               |                     |                  |                |               | X                   | X                |
| Caprifoliaceae  | <i>Sambucus nigra</i> L.                                                | (tilo)                                | Cu                               | t           | med | 2.6                           | 0.1                                  |                | X             | X                   | X                |                |               | X                   | X                |
| Caricaceae      | <i>Carica papaya</i> L.                                                 | Pawpaw, Papaya (papaya)               | Es                               | t           | edi | 53.8                          | *25.6                                | X              | X             | X                   | X                | X              | X             | X                   | X                |

| Family          | Species name                                                                         | Common name English (local-Spanish)        | Introduction status in Galapagos | Growth form | Use | % of visited rural properties | % of fully surveyed urban properties | Floreana_rural | Isabela_rural | San Cristobal_rural | Santa Cruz_rural | Floreana_urban | Isabela_urban | San Cristobal_urban | Santa Cruz_urban |
|-----------------|--------------------------------------------------------------------------------------|--------------------------------------------|----------------------------------|-------------|-----|-------------------------------|--------------------------------------|----------------|---------------|---------------------|------------------|----------------|---------------|---------------------|------------------|
| Caricaceae      | <i>Carica x heilbornii</i> (Heilborn) V.M. Badillo                                   | (babaco)                                   | Cu                               | sh          | edi | 1.1                           |                                      |                |               | X                   |                  |                |               |                     |                  |
| Caryophyllaceae | <i>Dianthus caryophyllus</i> L.                                                      | (clavel)                                   | Cu                               | h           | orn | 1.5                           | 0.2                                  |                |               | X                   | X                |                |               | X                   | X                |
| Caryophyllaceae | <i>Stellaria media</i> (L.) Vill.                                                    |                                            | Ac                               | h           | non | 2.4                           |                                      | X              | X             |                     |                  |                |               |                     |                  |
| Casuarinaceae   | <i>Casuarina equisetifolia</i> L.                                                    | (árbol de hierro, casuarina)               | Cu                               | t           | orn | 0.2                           | <0.1                                 |                |               |                     | X                |                |               |                     | X                |
| Cecropiaceae    | <i>Cecropia</i> cf. <i>angustifolia</i> Trécul <sup>1</sup>                          |                                            | Cu                               | t           | orn | 0.4                           |                                      |                |               | X                   | X                |                |               |                     |                  |
| Chenopodiaceae  | <i>Beta vulgaris</i> var. <i>cicla</i> (L.) Koch <sup>1</sup>                        | Chard (acelga)                             | Cu                               | h           | edi | 4.0                           | 0.1                                  | X              | X             | X                   | X                |                | X             |                     | X                |
| Chenopodiaceae  | <i>Beta vulgaris</i> var. <i>vulgaris</i> L.                                         | Beetroot (remolacha)                       | Cu                               | h           | edi | 4.6                           | 0.1                                  | X              | X             | X                   | X                |                | X             | X                   | X                |
| Chenopodiaceae  | <i>Chenopodium ambrosioides</i> L.                                                   | Wormseed, Mexican Tea (paico)              | Es                               | h           | med | 10.1                          | 2.1                                  |                | X             | X                   |                  | X              | X             | X                   | X                |
| Chenopodiaceae  | <i>Chenopodium murale</i> L.                                                         |                                            | Ac                               | h           | non |                               | 0.1                                  |                |               |                     |                  | X              | X             |                     | X                |
| Clusiaceae      | <i>Mammea americana</i> L. <sup>1</sup>                                              | Mammee Apple (mamey)                       | Cu                               | t           | edi | 0.7                           | 0.1                                  |                | X             | X                   |                  |                |               | X                   | X                |
| Combretaceae    | <i>Quisqualis indica</i> L. <sup>1</sup>                                             |                                            | Cu                               | v           | orn |                               | nfs                                  |                |               |                     |                  |                |               |                     | X                |
| Combretaceae    | <i>Terminalia catappa</i> L.                                                         | Indian Almond (almendro)                   | Cu                               | t           | orn | 10.3                          | 7.7                                  | X              | X             | X                   | X                | X              | X             | X                   | X                |
| Commelinaceae   | <i>Callisia fragrans</i> (Lindl.) Woodson <sup>1</sup>                               |                                            | Cu                               | h           | orn |                               | 0.6                                  |                |               |                     |                  |                |               | X                   |                  |
| Commelinaceae   | <i>Callisia repens</i> (Jacq.) L. <sup>1</sup>                                       |                                            | Cu                               | h           | orn | 1.1                           | 1.1                                  |                |               | X                   |                  |                |               | X                   |                  |
| Commelinaceae   | <i>Tradescantia fluminensis</i> Vell. <sup>1</sup>                                   |                                            | Es                               | v           | orn | 3.5                           | 1.1                                  |                | X             | X                   | X                |                |               | X                   | X                |
| Commelinaceae   | <i>Tradescantia pallida</i> (Rose) D.R. Hunt                                         |                                            | Cu                               | h           | orn | 1.3                           | 0.9                                  |                |               | X                   |                  |                |               | X                   | X                |
| Commelinaceae   | <i>Tradescantia</i> sp. 1 <sup>1</sup>                                               |                                            | Cu                               | h           | orn |                               | <0.1                                 |                |               |                     |                  |                |               |                     | X                |
| Commelinaceae   | <i>Tradescantia</i> sp. 2 <sup>1</sup>                                               |                                            | Cu                               | h           | orn |                               | 0.1                                  |                |               |                     |                  |                | X             |                     | X                |
| Commelinaceae   | <i>Tradescantia spathacea</i> Sw.                                                    | (barquito de San Pedro, barca de San Pedr) | Cu                               | h           | orn | 0.9                           | 2.9                                  |                |               | X                   | X                |                |               | X                   | X                |
| Commelinaceae   | <i>Tradescantia zebrina</i> hort. ex Bosse                                           |                                            | Es                               | h           | orn | 1.8                           | 1.1                                  |                |               | X                   | X                |                |               | X                   | X                |
| Convolvulaceae  | <i>Ipomoea alba</i> L.                                                               |                                            | NaQ                              | v           | non | 19.8                          |                                      |                | X             |                     |                  |                |               |                     |                  |
| Convolvulaceae  | <i>Ipomoea batatas</i> (L.) Lam.                                                     | Sweet Potato (camote)                      | Es                               | v           | edi | 26.0                          | 1.6                                  | X              | X             | X                   | X                | X              | X             | X                   | X                |
| Convolvulaceae  | <i>Ipomoea carnea</i> ssp. <i>fiatosa</i> (Mart. ex Choisy) D.F. Austin <sup>1</sup> |                                            | Cu                               | ssh         | orn | 0.2                           | 0.1                                  |                |               | X                   |                  |                |               | X                   | X                |
| Convolvulaceae  | <i>Ipomoea nil</i> (L.) Roth                                                         |                                            | AcQ                              | v           | non | 0.5                           | 3.5                                  |                |               | X                   |                  | X              |               | X                   | X                |
| Convolvulaceae  | <i>Ipomoea quamoclit</i> L.                                                          |                                            | Es                               | v           | orn | 0.2                           | 0.5                                  |                | X             |                     |                  | X              | X             | X                   | X                |
| Convolvulaceae  | <i>Ipomoea tricolor</i> Cav. <sup>1</sup>                                            |                                            | Cu                               | v           | orn | 0.4                           | 0.1                                  |                | X             |                     |                  | X              |               | X                   | X                |
| Convolvulaceae  | <i>Merremia umbellata</i> (L.) Hallier f.                                            |                                            | AcQ                              | v           | non | 2.0                           | 0.5                                  |                |               | X                   |                  |                |               | X                   |                  |
| Convolvulaceae  | <i>Stictocardia tiliifolia</i> (Desr.) Hallier f.                                    | (soguilla)                                 | NaQ                              | v           | non | 11.2                          | <0.1                                 |                | X             | X                   |                  |                |               |                     | X                |
| Crassulaceae    | <i>Aeonium</i> sp. 1 <sup>1</sup>                                                    |                                            | Cu                               | s           | orn |                               | nfs                                  |                |               |                     |                  |                |               |                     | X                |
| Crassulaceae    | <i>Bryophyllum daigremontianum</i> (Raym.-Hamet & H. Perrier) A. Berger <sup>1</sup> | (dulcamara, siempreviva)                   | Cu                               | s           | orn | 1.1                           | 4.8                                  |                | X             | X                   | X                | X              | X             | X                   | X                |
| Crassulaceae    | <i>Bryophyllum gastonis-bonnierii</i> (Raym.-Hamet & H. Perrier) Lauz.-March.        | (dulcamara)                                | Cu                               | s           | orn | 2.0                           | 1.7                                  |                | X             | X                   |                  |                | X             | X                   | X                |
| Crassulaceae    | <i>Bryophyllum pinnatum</i> (Lam.) Oken                                              | Mother-of-Thousands (hoja                  | Es                               | s           | med | *79.3                         | 4.4                                  | X              | X             | X                   | X                | X              | X             | X                   | X                |

| Family        | Species name                                                        | Common name English (local-Spanish)   | Introduction status in Galapagos | Growth form | Use | % of visited rural properties | % of fully surveyed urban properties | Floreana_rural | Isabela_rural | San Cristobal_rural | Santa Cruz_rural | Floreana_urban | Isabela_urban | San Cristobal_urban | Santa Cruz_urban |
|---------------|---------------------------------------------------------------------|---------------------------------------|----------------------------------|-------------|-----|-------------------------------|--------------------------------------|----------------|---------------|---------------------|------------------|----------------|---------------|---------------------|------------------|
|               |                                                                     | del aire)                             |                                  |             |     |                               |                                      |                |               |                     |                  |                |               |                     |                  |
| Crassulaceae  | <i>Crassula ovata</i> (Mill.) Druce <sup>1</sup>                    |                                       | Cu                               | s           | orn | 0.4                           | 0.5                                  |                |               |                     | X                |                |               | X                   | X                |
| Crassulaceae  | <i>Echeveria peacockii</i> Croucher <sup>1</sup>                    |                                       | Cu                               | s           | orn | 0.2                           | <0.1                                 |                |               | X                   |                  |                | X             |                     |                  |
| Crassulaceae  | <i>Echeveria pulvinata</i> Rose <sup>1</sup>                        |                                       | Cu                               | s           | orn |                               | 0.1                                  |                |               |                     |                  |                |               | X                   |                  |
| Crassulaceae  | <i>Graptopetalum paraguayense</i> (N.E.Br.) E. Walther <sup>1</sup> |                                       | Cu                               | s           | orn | 0.4                           | 0.4                                  |                |               | X                   |                  |                |               | X                   |                  |
| Crassulaceae  | <i>Greenovia aurea</i> Webb & Berth. <sup>1</sup>                   |                                       | Cu                               | s           | orn | 0.2                           | 0.2                                  |                |               |                     | X                |                |               | X                   | X                |
| Crassulaceae  | <i>Kalanchoe blossfeldiana</i> Poelln.                              |                                       | Cu                               | s           | orn | 6.6                           | 6.1                                  |                | X             | X                   | X                | X              | X             | X                   | X                |
| Crassulaceae  | <i>Kalanchoe eriophylla</i> Hills. & Bojer ex Tul. <sup>1</sup>     |                                       | Cu                               | s           | orn |                               | <0.1                                 |                |               |                     |                  |                |               |                     | X                |
| Crassulaceae  | <i>Kalanchoe fedtschenkoi</i> Ham. Pers.                            |                                       | Cu                               | s           | orn | 0.2                           | 0.3                                  |                | X             |                     |                  |                | X             | X                   | X                |
| Crassulaceae  | <i>Kalanchoe tubiflora</i> (Harv.) Raym.-Hamet                      |                                       | Es                               | s           | orn | 2.4                           | 2.0                                  |                | X             | X                   | X                |                | X             | X                   | X                |
| Crassulaceae  | <i>Sedum lineare</i> Thunb. <sup>1</sup>                            |                                       | Cu                               | s           | orn |                               | <0.1                                 |                |               |                     |                  |                |               |                     | X                |
| Crassulaceae  | <i>Sedum pachyphyllum</i> Rose <sup>1</sup>                         |                                       | Cu                               | s           | orn |                               | 0.1                                  |                |               |                     |                  |                |               | X                   | X                |
| Crassulaceae  | <i>Sedum rubrotinctum</i> R.T. Clausen <sup>1</sup>                 |                                       | Cu                               | s           | orn |                               | <0.1                                 |                |               |                     |                  |                |               | X                   |                  |
| Cucurbitaceae | <i>Citrullus lanatus</i> (Thunb.) Matsun. & Nakai                   | Watermelon (sandía)                   | Es                               | v           | edi | 10.1                          | 6.8                                  | X              | X             | X                   |                  | X              | X             | X                   | X                |
| Cucurbitaceae | <i>Cucumis dipsaceus</i> Ehrenb. ex Spach                           | (huevo de tigre)                      | AcQ                              | v           | non | 5.7                           | 7.9                                  | X              | X             | X                   |                  |                | X             | X                   | X                |
| Cucurbitaceae | <i>Cucumis melo</i> L.                                              | Melon (melón)                         | Cu                               | v           | edi | 5.7                           | 1.3                                  |                | X             | X                   |                  | X              | X             | X                   | X                |
| Cucurbitaceae | <i>Cucumis sativus</i> L.                                           | Cucumber (pepinillo, pepino)          | Cu                               | v           | edi | 10.8                          | 1.0                                  | X              | X             | X                   |                  | X              | X             | X                   | X                |
| Cucurbitaceae | <i>Cucurbita ficifolia</i> Bouché                                   | Fig-leaf Gourd (zambo)                | Cu                               | v           | edi | 2.7                           | 0.3                                  |                | X             | X                   | X                |                |               | X                   | X                |
| Cucurbitaceae | <i>Cucurbita moschata</i> (Duchesne ex Lam.) Duchesne ex Poir.      | Pumpkin, Winter Squash (zapallo)      | Cu                               | v           | edi | 15.0                          | 1.5                                  |                | X             | X                   | X                |                | X             | X                   | X                |
| Cucurbitaceae | <i>Cucurbita pepo</i> L.                                            | Courgette, Marrow (zucchini)          | Cu                               | v           | edi | 1.3                           | 0.1                                  | X              | X             | X                   |                  |                | X             |                     |                  |
| Cucurbitaceae | <i>Cyclanthera pedata</i> var. <i>edulis</i> (Naudin) Cogn.         | (achogcha)                            | Cu                               | h           | edi | 2.9                           | 0.1                                  |                | X             | X                   | X                |                |               | X                   | X                |
| Cucurbitaceae | <i>Luffa cylindrica</i> (L.) M. Roem.                               | Loofa (esponja)                       | Cu                               | v           | oth |                               | 0.3                                  |                |               |                     |                  |                |               | X                   | X                |
| Cucurbitaceae | <i>Momordica charantia</i> L.                                       | (achogcha China)                      | Es                               | v           | non | 13.4                          | 12.4                                 |                |               | X                   | X                |                |               | X                   | X                |
| Cucurbitaceae | <i>Sicana odorifera</i> (Vell.) Naudin <sup>1</sup>                 | (girón, calabacín)                    | Es                               | v           | edi | 0.4                           |                                      |                | X             | X                   |                  |                |               |                     |                  |
| Cupressaceae  | <i>Cupressus macrocarpa</i> Hartw.                                  | (ciprés)                              | Cu                               | t           | orn | 4.0                           | 0.1                                  |                | X             | X                   | X                |                |               |                     | X                |
| Cupressaceae  | <i>Juniperus communis</i> Thunb. <sup>1</sup>                       | (ciprés)                              | Cu                               | t           | orn | 1.6                           | <0.1                                 |                |               | X                   |                  |                |               |                     | X                |
| Cupressaceae  | <i>Thuja orientalis</i> L.                                          | (ciprés)                              | Cu                               | t           | orn | 4.0                           | 3.4                                  |                | X             | X                   | X                | X              | X             | X                   | X                |
| Cycadaceae    | <i>Cycas circinalis</i> L. <sup>1</sup>                             |                                       | Cu                               | t           | orn | 0.2                           | 0.1                                  |                |               |                     | X                |                |               | X                   | X                |
| Cycadaceae    | <i>Cycas revoluta</i> Thunb. <sup>1</sup>                           |                                       | Cu                               | t           | orn | 0.5                           | 0.3                                  |                |               | X                   | X                |                |               | X                   | X                |
| Cyclanthaceae | <i>Carludovica palmata</i> Ruiz & Pav.                              | Panama Hat Palm (paja toquilla, cade) | Cu                               | t           | orn | 4.8                           | 0.3                                  |                | X             | X                   | X                |                |               | X                   | X                |
| Cyperaceae    | <i>Cyperus involucratus</i> Rottb.                                  |                                       | Es                               | h           | orn | 1.1                           | 1.8                                  | X              |               | X                   | X                |                | X             | X                   | X                |

| Family        | Species name                                                               | Common name English (local-Spanish)                        | Introduction status in Galapagos | Growth form | Use | % of visited rural properties | % of fully surveyed urban properties | Floreana_rural | Isabela_rural | San Cristobal_rural | Santa Cruz_rural | Floreana_urban | Isabela_urban | San Cristobal_urban | Santa Cruz_urban |
|---------------|----------------------------------------------------------------------------|------------------------------------------------------------|----------------------------------|-------------|-----|-------------------------------|--------------------------------------|----------------|---------------|---------------------|------------------|----------------|---------------|---------------------|------------------|
| Cyperaceae    | <i>Cyperus odoratus</i> L.                                                 |                                                            | Ac                               | h           | non | 28.0                          | 1.3                                  | X              | X             |                     | X                |                | X             | X                   | X                |
| Cyperaceae    | <i>Cyperus papyrus</i> L.                                                  | (papiro)                                                   | Cu                               | h           | orn |                               | <0.1                                 |                |               |                     |                  |                |               |                     | X                |
| Cyperaceae    | <i>Cyperus rotundus</i> L.                                                 |                                                            | Ac                               | h           | non | 0.4                           | <0.1                                 |                |               | X                   |                  |                |               | X                   |                  |
| Cyperaceae    | <i>Eleocharis geniculata</i> (L.) Roem. & Schult.                          |                                                            | NaQ                              | h           | non |                               | 0.3                                  |                |               |                     |                  |                | X             |                     |                  |
| Cyperaceae    | <i>Rhynchospora radicans</i> (Schltdl. & Cham.) Pfeiffer                   |                                                            | NaQ                              | h           | non | 0.2                           |                                      |                |               | X                   |                  |                |               |                     |                  |
| Davalliaceae  | <i>Nephrolepis cordifolia cordifolia</i> (L.) C. Presl.                    |                                                            | Cu                               | h           | orn | 1.1                           | 0.2                                  |                |               | X                   | X                |                | X             |                     | X                |
| Davalliaceae  | <i>Nephrolepis exaltata</i> cv. <i>Gretnae</i> (L.) Schott                 |                                                            | Cu                               | h           | orn | 1.5                           | 3.8                                  |                | X             | X                   |                  |                | X             | X                   | X                |
| Davalliaceae  | <i>Nephrolepis exaltata</i> cv. <i>Norwoodii</i> (L.) Schott. <sup>1</sup> |                                                            | Cu                               | h           | orn | 0.7                           |                                      |                |               |                     | X                |                | X             |                     |                  |
| Davalliaceae  | <i>Nephrolepis exaltata</i> cv. <i>Smithii</i> (L.) Schott                 |                                                            | Cu                               | h           | orn | 0.2                           | <0.1                                 |                |               | X                   |                  |                |               |                     |                  |
| Davalliaceae  | <i>Nephrolepis exaltata</i> cv. <i>Verona</i> (L.) Schott <sup>1</sup>     |                                                            | Cu                               | h           | orn | 0.2                           |                                      |                |               | X                   |                  |                |               |                     |                  |
| Davalliaceae  | <i>Nephrolepis pendula</i> (Raddi) J. Sm.                                  |                                                            | Cu                               | h           | orn | 0.4                           | <0.1                                 |                |               | X                   | X                |                |               |                     | X                |
| Dilleniaceae  | <i>Dillenia indica</i> L.                                                  | (leña de índigo)                                           | Cu                               | t           | orn | 0.2                           |                                      |                |               |                     | X                |                |               |                     |                  |
| Dracaenaceae  | <i>Dracaena angustifolia</i> Roxb. <sup>1</sup>                            |                                                            | Cu                               | ssh         | orn | 1.1                           | 1.2                                  |                | X             | X                   | X                |                | X             | X                   | X                |
| Dracaenaceae  | <i>Dracaena deremensis</i> Engl. <sup>1</sup>                              |                                                            | Cu                               | ssh         | orn | 0.9                           | 0.4                                  |                |               | X                   | X                |                | X             | X                   | X                |
| Dracaenaceae  | <i>Dracaena fragrans</i> (L.) Ker Gawl. <sup>1</sup>                       |                                                            | Cu                               | ssh         | orn | 0.9                           | 1.2                                  |                | X             | X                   |                  |                | X             | X                   | X                |
| Dracaenaceae  | <i>Dracaena marginata</i> Hort. <sup>1</sup>                               |                                                            | Cu                               | ssh         | orn | 0.2                           | 0.1                                  |                |               |                     | X                |                |               | X                   | X                |
| Dracaenaceae  | <i>Dracaena sanderiana</i> Mast. <sup>1</sup>                              |                                                            | Cu                               | sh          | orn |                               | <0.1                                 |                |               |                     |                  |                |               | X                   |                  |
| Dracaenaceae  | <i>Sansevieria stuckyi</i> God.-Leb. <sup>1</sup>                          |                                                            | Cu                               | h           | orn |                               | 0.1                                  |                |               |                     |                  |                |               | X                   |                  |
| Dracaenaceae  | <i>Sansevieria trifasciata</i> Prain                                       | Mother-in-law's Tongue (lengua de suegra)                  | Es                               | h           | orn | 6.2                           | 6.5                                  |                | X             | X                   | X                | X              | X             | X                   | X                |
| Euphorbiaceae | <i>Acalypha amentacea wilkesiana</i> (Müll. Arg.) Fosberg                  | Beefsteak plant, copperleaf, Jacob's coat (cresta de pavo) | Cu                               | sh          | orn | 7.3                           | 1.1                                  |                | X             | X                   | X                |                | X             | X                   | X                |
| Euphorbiaceae | <i>Acalypha hispida</i> Burm. f.                                           | Chenille plant (cola de zorro, rabo de mono)               | Cu                               | sh          | orn | 1.6                           | 0.3                                  |                | X             | X                   | X                |                | X             | X                   | X                |
| Euphorbiaceae | <i>Acalypha marginata</i> Spreng.                                          |                                                            | Cu                               | sh          | orn | 5.9                           | 0.4                                  |                | X             | X                   | X                |                | X             | X                   | X                |
| Euphorbiaceae | <i>Aleurites moluccana</i> (L.) Willd. <sup>1</sup>                        | Candlenut (coco Chile, árbol de tocte)                     | Cu                               | t           | oth | 1.1                           | 0.1                                  |                |               | X                   |                  |                |               | X                   |                  |
| Euphorbiaceae | <i>Breynia disticha</i> var. <i>nivosa</i> (W. Bull) Croizat               | Foliage flower, snowbush (arbolito de Navidad)             | Cu                               | sh          | orn | 3.7                           | 6.7                                  |                | X             | X                   |                  |                | X             | X                   | X                |
| Euphorbiaceae | <i>Chamaesyce hirta</i> (L.) Millsp.                                       |                                                            | Ac                               | h           | non | 1.6                           |                                      |                |               | X                   |                  |                |               |                     |                  |
| Euphorbiaceae | <i>Chamaesyce ophthalmica</i> (Pers.) D.G. Burch                           |                                                            | Ac                               | h           | non | 32.6                          | 14.3                                 | X              | X             | X                   | X                | X              | X             | X                   | X                |
| Euphorbiaceae | <i>Chamaesyce thymifolia</i> (L.) Millsp. <sup>1</sup>                     |                                                            | Ac                               | v           | non |                               | 1.7                                  |                |               |                     |                  |                |               |                     | X                |

| Family        | Species name                                                        | Common name English (local-Spanish)                            | Introduction status in Galapagos | Growth form | Use | % of visited rural properties | % of fully surveyed urban properties | Floreana_rural | Isabela_rural | San Cristobal_rural | Santa Cruz_rural | Floreana_urban | Isabela_urban | San Cristobal_urban | Santa Cruz_urban |
|---------------|---------------------------------------------------------------------|----------------------------------------------------------------|----------------------------------|-------------|-----|-------------------------------|--------------------------------------|----------------|---------------|---------------------|------------------|----------------|---------------|---------------------|------------------|
| Euphorbiaceae | <i>Cnidioscolus aconitifolius</i> (Mill.) I.M. Johnst. <sup>1</sup> | Tree Spinach (chaya, saya)                                     | Es                               | sh          | med | 3.8                           | 1.7                                  |                |               | X                   | X                |                |               | X                   | X                |
| Euphorbiaceae | <i>Codiaeum variegatum</i> (L.) A. Juss.                            | Croton (croton, espelma)                                       | Cu                               | sh          | orn | 18.1                          | 12.7                                 | X              | X             | X                   | X                | X              | X             | X                   | X                |
| Euphorbiaceae | <i>Euphorbia cotinifolia</i> L.                                     |                                                                | Cu                               | sh          | orn | 0.4                           | <0.1                                 |                | X             |                     | X                |                |               |                     | X                |
| Euphorbiaceae | <i>Euphorbia cyathophora</i> Murray                                 |                                                                | Es                               | h           | orn | 1.3                           | 1.8                                  |                | X             | X                   |                  |                | X             | X                   | X                |
| Euphorbiaceae | <i>Euphorbia graminea</i> Jacq. <sup>1</sup>                        |                                                                | Ac                               | h           | non | 22.0                          | 0.9                                  |                | X             | X                   |                  |                | X             | X                   |                  |
| Euphorbiaceae | <i>Euphorbia heterophylla</i> L.                                    |                                                                | Es                               | h           | non | 0.4                           | 0.6                                  |                |               | X                   |                  |                | X             | X                   | X                |
| Euphorbiaceae | <i>Euphorbia lactea</i> Haw.                                        |                                                                | Cu                               | ssh         | orn | 2.6                           | 3.4                                  | X              | X             | X                   | X                | X              | X             | X                   | X                |
| Euphorbiaceae | <i>Euphorbia milii</i> Des Moul.                                    | Crown of Thorns (corona del Señor, corona de Cristo)           | Cu                               | ssh         | orn | 1.5                           | 1.6                                  |                | X             | X                   | X                |                | X             | X                   | X                |
| Euphorbiaceae | <i>Euphorbia pulcherrima</i> Willd. ex Klotzsch                     | Poinsettia (flor de Panamá, flor de Pascua)                    | Cu                               | sh          | orn | 2.6                           | 2.0                                  |                | X             | X                   | X                |                | X             | X                   | X                |
| Euphorbiaceae | <i>Euphorbia tirucalli</i> L.                                       |                                                                | Cu                               | sh          | orn |                               | 0.1                                  |                |               |                     |                  |                |               |                     | X                |
| Euphorbiaceae | <i>Jatropha curcas</i> L.                                           | (piñon)                                                        | Es                               | sh          | oth | 6.8                           | 0.4                                  |                | X             | X                   |                  | X              | X             | X                   | X                |
| Euphorbiaceae | <i>Jatropha gossypifolia</i> L. <sup>1</sup>                        |                                                                | Es                               | sh          | non |                               | <0.1                                 |                |               |                     |                  |                |               |                     | X                |
| Euphorbiaceae | <i>Jatropha podagrica</i> Hook. <sup>1</sup>                        |                                                                | Cu                               | ssh         | orn | 0.4                           | 0.2                                  |                | X             | X                   |                  |                |               | X                   | X                |
| Euphorbiaceae | <i>Manihot esculenta</i> Crantz                                     | Cassava, Manioc (yuca)                                         | Cu                               | sh          | edi | 38.3                          | 2.1                                  | X              | X             | X                   | X                |                | X             | X                   | X                |
| Euphorbiaceae | <i>Pedilanthus tithymaloides</i> (L.) Poit.                         | (zapatillas rojas)                                             | Cu                               | ssh         | orn | 4.9                           | 4.0                                  |                | X             | X                   | X                | X              | X             | X                   | X                |
| Euphorbiaceae | <i>Phyllanthus acidus</i> (L.) Skeels                               | (grosella)                                                     | Cu                               | t           | edi | 3.5                           | 5.3                                  | X              | X             | X                   | X                | X              | X             | X                   | X                |
| Euphorbiaceae | <i>Ricinus communis</i> L.                                          | Castor Oil (higuerrilla)                                       | Es                               | ssh         | non | 34.2                          | *20.5                                | X              | X             | X                   | X                |                | X             | X                   | X                |
| Fabaceae      | <i>Abrus precatorius</i> L.                                         |                                                                | Es                               | v           | non | 0.5                           | <0.1                                 | X              |               |                     |                  |                |               |                     | X                |
| Fabaceae      | <i>Arachis hypogaea</i> L.                                          | Groundnut, Peanut (maní)                                       | Es                               | h           | edi | 1.6                           | nfs                                  |                | X             | X                   | X                |                |               |                     | X                |
| Fabaceae      | <i>Arachis pintoi</i> Krapov. & W.C. Gregory <sup>1</sup>           | Pinto peanut, fodder peanut, perennial peanut (maní forrajero) | Cu                               | h           | non | 0.4                           |                                      |                |               | X                   |                  |                |               |                     |                  |
| Fabaceae      | <i>Cajanus cajan</i> (L.) Millsp.                                   | Pigeon Pea (fréjol de palo)                                    | Cu                               | ssh         | edi | 16.1                          | 2.0                                  | X              | X             | X                   | X                | X              |               | X                   | X                |
| Fabaceae      | <i>Canavalia ensiformis</i> L. <sup>1</sup>                         | Jack bean (soya)                                               | Cu                               | v           | edi | 0.2                           |                                      |                |               | X                   |                  |                |               |                     |                  |
| Fabaceae      | <i>Centrolobium paraense</i> Tul.                                   | (amarillo lagarto)                                             | Cu                               | t           | tim | 2.7                           | <0.1                                 |                | X             | X                   | X                |                |               | X                   |                  |
| Fabaceae      | <i>Clitoria ternatea</i> L.                                         |                                                                | Es                               | v           | orn | 0.4                           | 0.3                                  |                |               | X                   |                  |                |               | X                   | X                |
| Fabaceae      | <i>Crotalaria retusa</i> L.                                         |                                                                | AcQ                              | h           | non | 4.9                           | 1.7                                  |                |               | X                   |                  |                |               | X                   |                  |
| Fabaceae      | <i>Desmodium glabrum</i> (Mill.) DC.                                |                                                                | NaQ                              | h           | non |                               | 1.5                                  |                |               |                     |                  |                |               | X                   | X                |
| Fabaceae      | <i>Desmodium incanum</i> DC.                                        |                                                                | NaQ                              | h           | non | 65.6                          | 0.1                                  | X              | X             | X                   | X                |                |               | X                   |                  |
| Fabaceae      | <i>Desmodium intortum</i> (Mill.) Urb.                              |                                                                | NaQ                              | h           | non | 24.7                          |                                      |                | X             | X                   | X                |                |               |                     |                  |
| Fabaceae      | <i>Erythrina corallodendron</i> Herb. Madr. ex Wallich              |                                                                | Cu                               | t           | oth | 2.6                           |                                      |                | X             |                     | X                |                |               |                     |                  |
| Fabaceae      | <i>Erythrina edulis</i> Triana ex Micheli <sup>1</sup>              | (guato)                                                        | Cu                               | t           | edi | 0.2                           |                                      |                |               |                     | X                |                |               |                     |                  |
| Fabaceae      | <i>Erythrina fusca</i> Lour.                                        | (palo prieto, porotillo)                                       | Cu                               | t           | oth | 1.1                           |                                      |                | X             |                     |                  |                |               |                     |                  |
| Fabaceae      | <i>Erythrina poeppigiana</i> (Walp.) O.F. Cook                      | (poro gigante)                                                 | Cu                               | t           | oth | 2.4                           |                                      |                | X             | X                   | X                |                |               |                     |                  |

| Family           | Species name                                             | Common name English (local-Spanish)                 | Introduction status in Galapagos | Growth form | Use | % of visited rural properties | % of fully surveyed urban properties | Floreana_rural | Isabela_rural | San Cristobal_rural | Santa Cruz_rural | Floreana_urban | Isabela_urban | San Cristobal_urban | Santa Cruz_urban |
|------------------|----------------------------------------------------------|-----------------------------------------------------|----------------------------------|-------------|-----|-------------------------------|--------------------------------------|----------------|---------------|---------------------|------------------|----------------|---------------|---------------------|------------------|
| Fabaceae         | <i>Erythrina smithiana</i> Krukoff                       | (porotillo)                                         | Cu                               | t           | oth | 30.6                          | 0.1                                  | X              | X             | X                   | X                |                | X             | X                   |                  |
| Fabaceae         | <i>Geoffroea spinosa</i> Jacq.                           | (seca)                                              | NaQ                              | t           | orn | 0.4                           | 0.6                                  | X              |               |                     |                  | X              |               |                     |                  |
| Fabaceae         | <i>Gliricidia sepium</i> (Jacq.) Kunth ex Walp.          | (mata ratón, madero negro, nacedero)                | Cu                               | t           | oth | 6.0                           | 0.4                                  | X              | X             | X                   | X                | X              | X             | X                   | X                |
| Fabaceae         | <i>Lablab purpureus</i> (L.) Sweet                       | (zarandajo)                                         | Es                               | v           | edi | 4.6                           | 2.7                                  | X              | X             | X                   | X                | X              |               | X                   | X                |
| Fabaceae         | <i>Macroptilium lathyroides</i> (L.) Urb.                |                                                     | Es                               | h           | non | 0.9                           | 11.7                                 | X              |               | X                   |                  | X              |               | X                   |                  |
| Fabaceae         | <i>Medicago sativa</i> L.                                | Alfalfa, Lucerne (alfalfa)                          | Cu                               | h           | med | 2.9                           | <0.1                                 |                | X             | X                   | X                |                | X             |                     |                  |
| Fabaceae         | <i>Phaseolus coccineus</i> L. <sup>1</sup>               |                                                     | Cu                               | v           | edi | 0.2                           |                                      |                |               | X                   |                  |                |               |                     |                  |
| Fabaceae         | <i>Phaseolus lunatus</i> L. <sup>1</sup>                 | Butter Bean, Lima Bean (habichuela, fréjol de mata) | Cu                               | v           | edi | 4.6                           | 0.3                                  | X              | X             | X                   |                  | X              | X             | X                   | X                |
| Fabaceae         | <i>Phaseolus vulgaris</i> L.                             | (fréjol, vainita)                                   | Cu                               | v           | edi | 19.0                          | 0.9                                  | X              | X             | X                   | X                |                | X             | X                   | X                |
| Fabaceae         | <i>Pisum sativum</i> L.                                  | Pea (arveja, alverja)                               | Cu                               | v           | edi | 5.5                           | <0.1                                 | X              | X             | X                   | X                |                |               |                     | X                |
| Fabaceae         | <i>Spartium junceum</i> L. <sup>1</sup>                  | (retama)                                            | Cu                               | sh          | orn | 0.2                           |                                      |                | X             |                     |                  |                |               |                     |                  |
| Fabaceae         | <i>Trifolium cf. repens</i> L.                           | Clover (trébol)                                     | Cu                               | h           | oth | 0.2                           |                                      |                |               |                     | X                |                |               |                     |                  |
| Fabaceae         | <i>Vicia faba</i> L.                                     | Broad Bean (haba)                                   | Cu                               | h           | edi | 2.4                           | 0.3                                  | X              | X             | X                   |                  | X              |               | X                   | X                |
| Fabaceae         | <i>Vigna unguiculata</i> (L.) Walp. <sup>1</sup>         | Cowpea, Black-eyed Bean (verdura, fréjol chileno)   | Cu                               | v           | edi | 3.7                           | 0.8                                  |                | X             | X                   | X                |                | X             | X                   | X                |
| Fabaceae         | <i>Zornia curvata</i> Mohlenbr.                          |                                                     | Ac                               | h           | non | 1.6                           |                                      |                |               | X                   |                  |                |               |                     |                  |
| Flacourtiaceae   | <i>Muntingia calabura</i> L.                             | (niguito)                                           | Es                               | t           | orn | 0.5                           | 0.1                                  |                |               | X                   | X                |                |               | X                   | X                |
| Flacourtiaceae   | <i>Xylosma flexuosa</i> (Kunth) Hemsl.                   | (cereza)                                            | Es                               | t           | edi | 1.6                           |                                      |                | X             | X                   | X                |                |               |                     |                  |
| Geraniaceae      | <i>Pelargonium graveolens</i> L'Hér. <sup>1</sup>        | (malva olorosa, esencia de rosa)                    | Cu                               | h           | med | 0.5                           | 0.2                                  |                | X             |                     | X                |                | X             |                     | X                |
| Geraniaceae      | <i>Pelargonium peltatum</i> (L.) L'Hér. <sup>1</sup>     | (geranio)                                           | Cu                               | h           | orn |                               | <0.1                                 |                |               |                     |                  |                |               |                     | X                |
| Geraniaceae      | <i>Pelargonium x domesticum</i> L.H. Bailey <sup>1</sup> | Geranium (malva olorosa)                            | Cu                               | h           | orn |                               | <0.1                                 |                |               |                     |                  |                |               |                     | X                |
| Geraniaceae      | <i>Pelargonium x hortorum</i> L.H. Bailey                | Geranium (geranio)                                  | Cu                               | h           | orn | 7.3                           | 9.3                                  | X              | X             | X                   | X                | X              | X             | X                   | X                |
| Gesneriaceae     | <i>Episcia cupreata</i> (Hook.) Hanst.                   | (lazo de amor)                                      | Cu                               | h           | orn | 0.9                           | 1.1                                  |                |               | X                   | X                |                |               | X                   | X                |
| Gesneriaceae     | <i>Gloxinia perennis</i> (L.) Fritsch <sup>1</sup>       |                                                     | Cu                               | h           | orn | 0.4                           | 0.1                                  |                |               | X                   |                  |                |               | X                   |                  |
| Gesneriaceae     | <i>Gloxinia sylvatica</i> (Kunth) Wiehler <sup>1</sup>   |                                                     | Cu                               | h           | orn | 0.4                           | 0.1                                  |                | X             |                     |                  |                |               | X                   |                  |
| Gesneriaceae     | <i>Kohleria amabilis</i> (Planch. & Lindl.) Fritsch      |                                                     | Cu                               | h           | orn | 1.5                           | nfs                                  |                |               | X                   |                  |                |               |                     | X                |
| Gesneriaceae     | <i>Kohleria bogotensis</i> (G. Nicholson) Fritsch        |                                                     | Cu                               | h           | orn | 1.1                           | 1.5                                  |                |               | X                   |                  |                |               | X                   | X                |
| Gesneriaceae     | <i>Saintpaulia</i> cultivars                             | African Violet (violeta africana)                   | Cu                               | h           | orn | 0.4                           | 0.3                                  |                |               | X                   |                  |                |               | X                   | X                |
| Gesneriaceae     | <i>Sinningia speciosa</i> (Lodd.) Hiern <sup>1</sup>     |                                                     | Cu                               | h           | orn |                               | 0.1                                  |                |               |                     |                  |                |               | X                   | X                |
| Heliconiaceae    | <i>Heliconia latispatha</i> Benth. <sup>1</sup>          |                                                     | Cu                               | h           | orn | 0.5                           | 0.1                                  |                |               | X                   |                  |                |               | X                   |                  |
| Heliconiaceae    | <i>Heliconia</i> sp. 1 <sup>1</sup>                      |                                                     | Cu                               | h           | orn |                               | nfs                                  |                |               |                     |                  |                |               |                     | X                |
| Hydrangeaceae    | <i>Hydrangea macrophylla</i> (Thunb.) DC.                | Hydrangea (Hortensia)                               | Cu                               | ssh         | orn | 4.2                           | 0.6                                  |                | X             | X                   | X                |                | X             | X                   | X                |
| Hydrocharitaceae | <i>Hydrocharis morsus-ranae</i> L. <sup>1</sup>          |                                                     | Cu                               | h           | orn |                               | nfs                                  |                |               |                     |                  |                |               |                     | X                |

| Family       | Species name                                                             | Common name English (local-Spanish) | Introduction status in Galapagos | Growth form | Use | % of visited rural properties | % of fully surveyed urban properties | Floreana_rural | Isabela_rural | San Cristobal_rural | Santa Cruz_rural | Floreana_urban | Isabela_urban | San Cristobal_urban | Santa Cruz_urban |
|--------------|--------------------------------------------------------------------------|-------------------------------------|----------------------------------|-------------|-----|-------------------------------|--------------------------------------|----------------|---------------|---------------------|------------------|----------------|---------------|---------------------|------------------|
| Iridaceae    | <i>Crococsmia x crocosmiiflora</i> (Lemoine) N.E. Br. <sup>1</sup>       |                                     | Cu                               | h           | orn | 1.1                           | nfs                                  |                |               | X                   | X                |                |               |                     | X                |
| Iridaceae    | <i>Eleutherine bulbosa</i> (Mill.) Urb. <sup>1</sup>                     | (vara de justicia)                  | Cu                               | h           | orn | 3.5                           | 4.8                                  |                | X             | X                   | X                | X              | X             | X                   | X                |
| Iridaceae    | <i>Gladiolus communis</i> L.                                             | Gladiolus (gladiolo)                | Cu                               | h           | orn | 1.1                           | 0.3                                  |                |               | X                   | X                |                |               | X                   | X                |
| Iridaceae    | <i>Neomarica gracilis</i> (Herb.) Sprague <sup>1</sup>                   | (mano poderosa)                     | Cu                               | h           | orn | 1.8                           | 0.6                                  |                |               | X                   | X                |                | X             | X                   | X                |
| Iridaceae    | <i>Sisyrinchium micranthum</i> Cav.                                      |                                     | NaQ                              | h           | non | 2.6                           |                                      |                | X             | X                   |                  |                |               |                     |                  |
| Juglandaceae | <i>Juglans neotropica</i> Diels                                          | (nogal)                             | Es                               | t           | tim | 28.8                          |                                      | X              | X             | X                   | X                |                |               |                     |                  |
| Lamiaceae    | <i>Glechoma hederacea</i> L. <sup>1</sup>                                | (alivia dolor, cura todo)           | Cu                               | h           | med | 0.4                           | <0.1                                 |                | X             |                     |                  |                | X             |                     |                  |
| Lamiaceae    | <i>Hyptis mutabilis</i> (Rich.) Briq.                                    | (tres filos)                        | AcQ                              | h           | non | 32.1                          | <0.1                                 |                | X             |                     |                  |                |               |                     | X                |
| Lamiaceae    | <i>Hyptis pectinata</i> (L.) Doit.                                       | (poleo)                             | Ac                               | h           | non | 2.6                           | 1.8                                  | X              | X             | X                   | X                |                |               |                     | X                |
| Lamiaceae    | <i>Hyptis rhomboidea</i> M. Martens & Galeotti                           |                                     | Ac                               | h           | non | 2.9                           |                                      |                | X             |                     | X                |                |               |                     |                  |
| Lamiaceae    | <i>Hyptis sidifolia</i> (L'Hér.) Briq.                                   |                                     | Ac                               | h           | non | 17.0                          | 0.1                                  |                |               | X                   | X                |                |               |                     | X                |
| Lamiaceae    | <i>Hyptis</i> sp. 1                                                      |                                     | Es                               | h           | non | 0.4                           |                                      |                |               | X                   |                  |                |               |                     |                  |
| Lamiaceae    | <i>Melissa officinalis</i> L.                                            | Lemon Balm (toronjil)               | Cu                               | h           | med | 2.7                           | 0.2                                  |                |               | X                   | X                |                |               | X                   | X                |
| Lamiaceae    | <i>Mentha suaveolens</i> Ehrh. <sup>1</sup>                              |                                     | Cu                               | h           | med |                               | nfs                                  |                |               |                     |                  |                |               |                     | X                |
| Lamiaceae    | <i>Mentha x piperita</i> L.                                              | Peppermint (menta, hierba buena)    | Es                               | h           | med | 10.3                          | 4.1                                  |                | X             | X                   | X                | X              | X             | X                   | X                |
| Lamiaceae    | <i>Ocimum basilicum</i> var. <i>basilicum</i> L.                         | Basil (albaca)                      | Cu                               | h           | edi | 10.4                          | 7.4                                  |                | X             | X                   |                  | X              | X             | X                   | X                |
| Lamiaceae    | <i>Ocimum basilicum</i> var. <i>pilosum</i> (Willd.) Benth. <sup>1</sup> |                                     | Cu                               | h           | edi | 0.7                           | <0.1                                 |                |               |                     | X                |                |               |                     | X                |
| Lamiaceae    | <i>Ocimum campechianum</i> Mill.                                         | (albahaca morada)                   | Cu                               | h           | edi | 4.2                           | 0.1                                  |                | X             | X                   | X                |                |               | X                   | X                |
| Lamiaceae    | <i>Origanum vulgare</i> L.                                               | Orégano (orégano)                   | Cu                               | h           | edi | 3.5                           | 0.6                                  |                | X             | X                   | X                |                | X             | X                   | X                |
| Lamiaceae    | <i>Plectranthus coleoides</i> Benth.                                     | (barba de viejo)                    | Cu                               | h           | orn | 0.4                           |                                      |                |               | X                   | X                |                |               |                     |                  |
| Lamiaceae    | <i>Plectranthus unguentarius</i> Codd <sup>1</sup>                       | (oreganón, orégano grande)          | Es                               | h           | edi | 11.4                          | 7.1                                  |                | X             | X                   | X                | X              | X             | X                   | X                |
| Lamiaceae    | <i>Plectranthus verticillatus</i> (L. f.) Druce <sup>1</sup>             | (planta moneda)                     | Cu                               | h           | orn | 0.4                           | 0.6                                  |                |               | X                   |                  |                |               | X                   | X                |
| Lamiaceae    | <i>Rosmarinus officinalis</i> L.                                         | Rosemary (romero)                   | Cu                               | h           | med | 0.4                           |                                      |                |               | X                   | X                |                |               |                     |                  |
| Lamiaceae    | <i>Salvia leucantha</i> L.                                               | (terciopelo, boca de león)          | Cu                               | h           | orn | 0.2                           | 0.1                                  |                | X             |                     |                  |                |               |                     | X                |
| Lamiaceae    | <i>Salvia sagittata</i> Ruiz & Pav.                                      | (matico, salvia real)               | Es                               | h           | med | 0.4                           |                                      |                |               | X                   | X                |                |               |                     |                  |
| Lamiaceae    | <i>Scutellaria</i> sp. 1                                                 |                                     | Cu                               | h           | med | 0.5                           |                                      |                |               | X                   |                  |                |               |                     |                  |
| Lamiaceae    | <i>Solenostemon scutellarioides</i> (L.) Codd                            | (coleos)                            | Cu                               | h           | orn | 6.0                           | 2.7                                  |                | X             | X                   | X                |                | X             | X                   | X                |
| Lamiaceae    | <i>Stachys agraria</i> Cham. & Schtdl.                                   |                                     | Ac                               | h           | orn | 0.2                           |                                      |                |               |                     | X                |                |               |                     |                  |
| Lamiaceae    | <i>Stachys arvensis</i> L.                                               |                                     | Ac                               | h           | non | 1.5                           |                                      |                | X             |                     |                  |                |               |                     |                  |
| Lauraceae    | <i>Persea americana</i> Mill.                                            | Avocado (aguacate)                  | Es                               | t           | edi | *69.8                         | 0.8                                  | X              | X             | X                   | X                | X              |               | X                   | X                |
| Liliaceae    | <i>Hemerocallis hybrids</i> <sup>1</sup>                                 | (espiga de san Antonio)             | Cu                               | h           | orn | 0.5                           | 0.3                                  |                |               | X                   | X                |                | X             | X                   | X                |
| Liliaceae    | <i>Ledebouria socialis</i> (Bak.) Jessop <sup>1</sup>                    |                                     | Cu                               | h           | orn |                               | <0.1                                 |                |               |                     |                  |                |               |                     | X                |

| Family        | Species name                                                             | Common name English (local-Spanish)                  | Introduction status in Galapagos | Growth form | Use | % of visited rural properties | % of fully surveyed urban properties | Floreana_rural | Isabela_rural | San Cristobal_rural | Santa Cruz_rural | Floreana_urban | Isabela_urban | San Cristobal_urban | Santa Cruz_urban |
|---------------|--------------------------------------------------------------------------|------------------------------------------------------|----------------------------------|-------------|-----|-------------------------------|--------------------------------------|----------------|---------------|---------------------|------------------|----------------|---------------|---------------------|------------------|
| Liliaceae     | <i>Lilium candidum</i> L. <sup>1</sup>                                   | Madonna Lily (nardo, azucena)                        | Cu                               | h           | orn | 0.4                           | 0.1                                  |                |               |                     | X                |                |               | X                   | X                |
| Linaceae      | <i>Linum usitatissimum</i> L. <sup>1</sup>                               | Flax (linaza)                                        | Cu                               | h           | orn |                               | nfs                                  |                |               |                     |                  |                |               |                     | X                |
| Lythraceae    | <i>Cuphea bustamanta</i> Lex. <sup>1</sup>                               |                                                      | Cu                               | ssh         | orn | 0.2                           |                                      |                |               | X                   |                  |                |               |                     |                  |
| Lythraceae    | <i>Cuphea hyssopifolia</i> Kunth <sup>1</sup>                            |                                                      | Cu                               | h           | orn | 0.2                           | 0.1                                  |                |               |                     | X                |                |               | X                   |                  |
| Lythraceae    | <i>Cuphea racemosa</i> (L. f.) Spreng.                                   |                                                      | Ac                               | h           | non | 0.4                           |                                      |                |               | X                   | X                |                |               |                     |                  |
| Lythraceae    | <i>Lagerstroemia indica</i> L.                                           |                                                      | Cu                               | t           | orn | 2.6                           | 0.5                                  |                |               | X                   |                  |                |               | X                   |                  |
| Lythraceae    | <i>Lawsonia inermis</i> L. <sup>1</sup>                                  | Henna (reseda)                                       | Cu                               | sh          | orn |                               | 0.3                                  |                |               |                     |                  |                | X             |                     |                  |
| Malpighiaceae | <i>Banisteriopsis caapi</i> (Spruce ex Griseb.) C.V. Morton <sup>1</sup> | (ayahuasca)                                          | Cu                               | v           | med | 0.4                           |                                      |                |               | X                   | X                |                |               |                     |                  |
| Malpighiaceae | <i>Bunchosia cornifolia</i> Kunth <sup>1</sup>                           | Barbados Cherry (Nicaragua, Canadá, cererza serrana) | Cu                               | sh          | orn | 1.6                           | 0.5                                  |                |               | X                   | X                |                | X             | X                   | X                |
| Malpighiaceae | <i>Bunchosia</i> sp. 1                                                   |                                                      | Cu                               | t           | edi | 0.7                           |                                      |                |               | X                   | X                |                |               |                     |                  |
| Malpighiaceae | <i>Bunchosia</i> sp. 2                                                   |                                                      | Cu                               | t           | edi | 0.7                           |                                      |                |               | X                   |                  |                |               |                     |                  |
| Malpighiaceae | <i>Galphimia gracilis</i> Bartl. <sup>1</sup>                            |                                                      | Cu                               | sh          | orn |                               | nfs                                  |                |               |                     |                  |                |               |                     | X                |
| Malpighiaceae | <i>Malpighia coccigera</i> L. <sup>1</sup>                               |                                                      | Cu                               | sh          | edi | 0.2                           | <0.1                                 |                |               |                     | X                |                |               | X                   |                  |
| Malpighiaceae | <i>Malpighia emarginata</i> Sessé & Moc. ex DC. <sup>1</sup>             |                                                      | Cu                               | t           | edi | 0.7                           | <0.1                                 |                |               | X                   | X                |                | X             |                     | X                |
| Malvaceae     | <i>Abutilon dianthum</i> C. Presl. <sup>1</sup>                          |                                                      | Es                               | h           | non |                               | <0.1                                 |                |               |                     |                  |                | X             |                     |                  |
| Malvaceae     | <i>Anoda acerifolia</i> Cav.                                             |                                                      | AcQ                              | h           | non | 2.0                           | <0.1                                 | X              |               |                     | X                |                |               |                     | X                |
| Malvaceae     | <i>Gossypium barbadense</i> L.                                           | Sea Island Cotton (algodón)                          | Cu                               | sh          | orn | 0.9                           | 0.3                                  |                |               | X                   |                  |                |               | X                   | X                |
| Malvaceae     | <i>Hibiscus mutabilis</i> L. <sup>1</sup>                                |                                                      | Cu                               | sh          | orn |                               | <0.1                                 |                |               |                     |                  |                |               |                     | X                |
| Malvaceae     | <i>Hibiscus radiatus</i> Cav. <sup>1</sup>                               | Monarch Rosemallow (amapola)                         | Es                               | h           | orn | 0.5                           | 0.6                                  |                | X             | X                   |                  |                | X             | X                   | X                |
| Malvaceae     | <i>Hibiscus rosa-sinensis</i> var. <i>schizopetalus</i> Dyer             | (peregrino)                                          | Cu                               | sh          | orn | 31.0                          | 13.5                                 |                |               | X                   | X                |                | X             |                     | X                |
| Malvaceae     | <i>Hibiscus rosa-sinensis</i> L.                                         | (peregrina)                                          | Es                               | sh          | orn | 1.3                           | 0.1                                  | X              | X             | X                   | X                | X              | X             | X                   | X                |
| Malvaceae     | <i>Malachra alceifolia</i> Jacq.                                         |                                                      | Ac                               | h           | non |                               | 3.2                                  |                |               |                     |                  |                |               | X                   |                  |
| Malvaceae     | <i>Malachra capitata</i> (L.) L.                                         |                                                      | Ac                               | h           | non | 0.2                           |                                      |                |               | X                   |                  |                |               |                     |                  |
| Malvaceae     | <i>Malva parviflora</i> L.                                               | (malva)                                              | AcQ                              | h           | med | 0.5                           | nfs                                  | X              |               | X                   | X                |                |               |                     | X                |
| Malvaceae     | <i>Malvastrum americanum</i> (L.) Torr.                                  |                                                      | Ac                               | h           | non |                               | 0.1                                  |                |               |                     |                  |                |               |                     | X                |
| Malvaceae     | <i>Malvastrum coromandelianum</i> (L.) Garcke                            | (escoba de bruja)                                    | Ac                               | h           | non | 26.0                          | 8.6                                  | X              | X             | X                   |                  | X              | X             | X                   | X                |
| Malvaceae     | <i>Malvastrum tomentosum tomentosum</i> (L.) S.R. Hill                   |                                                      | Ac                               | h           | non |                               | 0.1                                  |                |               |                     |                  |                |               |                     | X                |
| Malvaceae     | <i>Malvaviscus arboreus</i> Cav.                                         |                                                      | Cu                               | sh          | orn | 14.7                          | 1.1                                  | X              | X             | X                   | X                | X              | X             | X                   | X                |
| Malvaceae     | <i>Sida acuta</i> Burm. f.                                               | (escoba negra)                                       | Ac                               | h           | non | 4.8                           | 0.2                                  | X              | X             | X                   | X                | X              | X             |                     | X                |
| Malvaceae     | <i>Sida ciliaris</i> L.                                                  |                                                      | Ac                               | h           | non |                               | 16.7                                 |                |               |                     |                  | X              | X             | X                   | X                |
| Malvaceae     | <i>Sida rhombifolia</i> L.                                               | (escobilla)                                          | Ac                               | h           | non | *72.9                         | 1.0                                  | X              | X             | X                   | X                | X              | X             | X                   | X                |
| Malvaceae     | <i>Sidastrum paniculatum</i> (L.) Fryxell                                |                                                      | Ac                               | ssh         | non | 7.5                           | 6.2                                  | X              |               | X                   |                  | X              |               | X                   |                  |



| Family      | Species name                                                    | Common name English (local-Spanish)                             | Introduction status in Galapagos | Growth form | Use | % of visited rural properties | % of fully surveyed urban properties | Floreana_rural | Isabela_rural | San Cristobal_rural | Santa Cruz_rural | Floreana_urban | Isabela_urban | San Cristobal_urban | Santa Cruz_urban |
|-------------|-----------------------------------------------------------------|-----------------------------------------------------------------|----------------------------------|-------------|-----|-------------------------------|--------------------------------------|----------------|---------------|---------------------|------------------|----------------|---------------|---------------------|------------------|
| Marantaceae | <i>Calathea allouia</i> (Aubl.) Lindl. <sup>1</sup>             | Guinea Arrowroot (tapioca)                                      | Cu                               | h           | edi | 0.2                           | 0.6                                  |                |               |                     | X                |                |               | X                   | X                |
| Marantaceae | <i>Calathea majestica</i> (Linden) H. Kenn. <sup>1</sup>        |                                                                 | Cu                               | h           | orn | 0.4                           | 0.1                                  |                |               | X                   | X                |                |               | X                   |                  |
| Marantaceae | <i>Calathea picturata</i> K. Koch & Linden <sup>1</sup>         |                                                                 | Cu                               | h           | orn |                               | 0.1                                  |                |               |                     |                  |                |               | X                   | X                |
| Marantaceae | <i>Calathea zebrina</i> (Sims) Lindel <sup>1</sup>              | (planta cebra)                                                  | Cu                               | h           | orn | 0.5                           | 0.8                                  |                |               | X                   | X                |                |               | X                   | X                |
| Marantaceae | <i>Ctenanthe setosa</i> Eichler                                 |                                                                 | Cu                               | h           | orn | 2.2                           | 0.9                                  |                |               | X                   | X                |                |               | X                   | X                |
| Marantaceae | <i>Maranta arundinacea</i> L. <sup>1</sup>                      |                                                                 | Cu                               | h           | orn | 0.2                           | 0.4                                  |                |               | X                   |                  |                |               | X                   |                  |
| Meliaceae   | <i>Cedrela odorata</i> L.                                       | Cuban Cedar, Cigar-box Cedar (cedrela)                          | Es                               | t           | tim | 65.9                          | 0.6                                  | X              | X             | X                   | X                |                |               | X                   | X                |
| Meliaceae   | <i>Melia azedarach</i> L.                                       | Chinaberry, Persian Lilac (jasmín de Arabia, san Jacinto)       | Es                               | t           | orn | 7.7                           | 1.4                                  | X              | X             | X                   |                  | X              | X             | X                   | X                |
| Meliaceae   | <i>Swietenia macrophylla</i> King                               | Mahogany (caoba)                                                | Cu                               | t           | tim | 5.1                           | 0.2                                  |                | X             | X                   | X                |                | X             | X                   | X                |
| Meliaceae   | <i>Swietenia mahagoni</i> Jacq. <sup>1</sup>                    |                                                                 | Cu                               | t           | orn |                               | nfs                                  |                |               |                     |                  |                |               |                     | X                |
| Mimosaceae  | <i>Acacia caven</i> (Molina) Molina <sup>1</sup>                |                                                                 | Cu                               | t           | non | 0.2                           | 0.5                                  |                |               | X                   |                  |                |               | X                   |                  |
| Mimosaceae  | <i>Acacia nilotica</i> (L.) Willd. ex Delile                    | Gum arabic tree, thorn mimosa, Egyptian thorn (acacia espinosa) | Es                               | t           | orn |                               | <0.1                                 |                |               |                     |                  |                |               |                     | X                |
| Mimosaceae  | <i>Calliandra calothyrsus</i> Meissner (C Am.)                  |                                                                 | Cu                               | t           | orn | 0.2                           |                                      | X              |               |                     |                  |                |               |                     |                  |
| Mimosaceae  | <i>Calliandra</i> cf. <i>tergemina</i> (L.) Benth. <sup>1</sup> |                                                                 | Cu                               | sh          | orn | 0.2                           | <0.1                                 |                |               |                     | X                |                |               | X                   |                  |
| Mimosaceae  | <i>Inga edulis</i> Mart.                                        | (guava bejuco, guava de mico)                                   | Cu                               | t           | edi | *70.3                         | 2.0                                  | X              | X             | X                   | X                | X              | X             | X                   | X                |
| Mimosaceae  | <i>Inga spectabilis</i> (Vahl) Willd.                           | (guava machete)                                                 | Es                               | t           | edi | 46.7                          | 1.0                                  | X              | X             | X                   |                  | X              |               | X                   |                  |
| Mimosaceae  | <i>Inga striata</i> Benth.                                      | (guaba de Castilla, guaba de caja)                              | Cu                               | t           | edi | 2.9                           | 0.1                                  |                | X             | X                   | X                |                | X             |                     | X                |
| Mimosaceae  | <i>Inga vera</i> Willd. <sup>1</sup>                            | (guava)                                                         | Cu                               | t           | edi | 0.4                           |                                      |                |               | X                   |                  |                |               |                     |                  |
| Mimosaceae  | <i>Leucaena leucocephala</i> ssp. <i>glabrata</i> (Rose) Zárate | (leucaena, ipel ipel)                                           | Es                               | sh          | non | 5.9                           | 6.1                                  | X              | X             | X                   | X                | X              | X             | X                   | X                |
| Mimosaceae  | <i>Leucaena trichodes</i> (Jacq.) Benth.                        |                                                                 | Es                               | t           | orn | 0.2                           | 0.6                                  |                | X             |                     |                  |                |               |                     | X                |
| Mimosaceae  | <i>Pseudosamanea guachapele</i> (Kunth) Harms                   | (guachapelí)                                                    | Cu                               | t           | orn | 10.4                          | 0.1                                  |                |               | X                   |                  |                |               | X                   | X                |
| Moraceae    | <i>Artocarpus altilis</i> (Parkinson) Fosberg                   | Breadfruit (frutipan, árbol de pan)                             | Cu                               | t           | edi | 3.5                           | <0.1                                 |                | X             | X                   | X                |                |               | X                   |                  |
| Moraceae    | <i>Artocarpus heterophyllus</i> Lam. <sup>1</sup>               |                                                                 | Cu                               | t           | edi |                               | <0.1                                 |                |               |                     |                  |                |               | X                   |                  |
| Moraceae    | <i>Ficus benjamina</i> L. <sup>1</sup>                          | (ficus)                                                         | Cu                               | t           | orn | 8.2                           | 5.4                                  |                | X             | X                   | X                |                | X             | X                   | X                |
| Moraceae    | <i>Ficus carica</i> L.                                          | Edible Fig (higo)                                               | Cu                               | sh          | edi | 5.7                           | 1.2                                  | X              | X             | X                   |                  | X              | X             | X                   | X                |
| Moraceae    | <i>Ficus</i> cf. <i>benghalensis</i> L.                         |                                                                 | Cu                               | t           | orn | 0.4                           |                                      |                | X             |                     |                  |                |               |                     |                  |

| Family        | Species name                                                                   | Common name English (local-Spanish)                | Introduction status in Galapagos | Growth form | Use | % of visited rural properties | % of fully surveyed urban properties | Floreana_rural | Isabela_rural | San Cristobal_rural | Santa Cruz_rural | Floreana_urban | Isabela_urban | San Cristobal_urban | Santa Cruz_urban |
|---------------|--------------------------------------------------------------------------------|----------------------------------------------------|----------------------------------|-------------|-----|-------------------------------|--------------------------------------|----------------|---------------|---------------------|------------------|----------------|---------------|---------------------|------------------|
| Moraceae      | <i>Ficus elastica</i> Roxb. ex Hornem.                                         | (caucho)                                           | Cu                               | t           | orn | 1.8                           | 0.2                                  |                | X             | X                   | X                |                | X             | X                   | X                |
| Moraceae      | <i>Ficus pumila</i> L. <sup>1</sup>                                            |                                                    | Es                               | v           | orn |                               | <0.1                                 |                |               |                     |                  |                |               |                     | X                |
| Musaceae      | <i>Musa acuminata</i> "Guineo enano" Colla                                     | (guineo enano)                                     | Cu                               | h           | edi | 51.3                          | 5.7                                  | X              | X             | X                   |                  |                |               | X                   |                  |
| Musaceae      | <i>Musa acuminata</i> "Guineo morado" AAA Colla                                | (guineo morado, guineo rojo)                       | Cu                               | h           | edi | 13.7                          | 0.3                                  | X              | X             | X                   |                  |                |               | X                   |                  |
| Musaceae      | <i>Musa acuminata</i> "Guineo" Colla                                           | Banana (guineo)                                    | Cu                               | h           | edi | 6.4                           | 0.1                                  | X              | X             | X                   | X                |                | X             | X                   | X                |
| Musaceae      | <i>Musa acuminata</i> "Orito" Colla                                            | Banana (orito)                                     | Cu                               | h           | edi | 11.2                          | <0.1                                 | X              | X             | X                   | X                |                |               | X                   | X                |
| Musaceae      | <i>Musa acuminata</i> x <i>balbisiana</i> "Maqueño" AAB Colla <sup>1</sup>     | (maqueño)                                          | Cu                               | h           | edi | 26.4                          | 0.7                                  | X              | X             | X                   |                  |                |               |                     |                  |
| Musaceae      | <i>Musa acuminata</i> x <i>balbisiana</i> "Verde" Colla                        | Plantain (verde, barraganete, dominico, repe)      | Cu                               | h           | edi | 4.6                           |                                      | X              | X             | X                   |                  | X              |               | X                   | X                |
| Musaceae      | <i>Musa velutina</i> H. Wendl & Drude <sup>1</sup>                             | (guineo de jardín)                                 | Cu                               | h           | orn | 0.4                           |                                      |                | X             |                     |                  |                |               |                     |                  |
| Musaceae      | <i>Ravenala madagascariensis</i> Sonn. <sup>1</sup>                            |                                                    | Cu                               | t           | orn |                               | <0.1                                 |                |               |                     |                  |                |               |                     | X                |
| Myrtaceae     | <i>Callistemon citrinus</i> (Curtis) Skeels                                    | Bottlebrush (cepillo)                              | Cu                               | t           | orn |                               | 0.1                                  |                |               |                     |                  |                |               | X                   | X                |
| Myrtaceae     | <i>Eucalyptus globulus</i> Labill.                                             | (eucalipto)                                        | Cu                               | t           | med | 0.5                           | <0.1                                 |                | X             | X                   |                  |                |               | X                   |                  |
| Myrtaceae     | <i>Eugenia stipitata</i> Mc Vaugh <sup>1</sup>                                 | (cinco de junio, azará, membrillo.)                | Cu                               | sh          | orn |                               | <0.1                                 |                |               |                     |                  |                |               | X                   |                  |
| Myrtaceae     | <i>Psidium guajava</i> L.                                                      | Guava (guayabo, guayaba)                           | Es                               | t           | edi | *90.7                         | 3.9                                  | X              | X             | X                   | X                | X              | X             | X                   | X                |
| Myrtaceae     | <i>Syzygium jambos</i> (L.) Alston                                             | Rose-apple (pomarosa)                              | Es                               | t           | edi | 42.5                          |                                      | X              | X             | X                   | X                |                |               |                     |                  |
| Myrtaceae     | <i>Syzygium malaccense</i> (L.) Merr. & L.M. Perry                             | (pera noruega)                                     | Es                               | t           | edi | 23.6                          | 0.2                                  | X              | X             | X                   | X                |                |               | X                   | X                |
| Nyctaginaceae | <i>Bougainvillea</i> hybrid cultivars                                          | (buganvilla, veranera)                             | Cu                               | v           | orn |                               | 0.5                                  |                |               |                     |                  |                |               |                     | X                |
| Nyctaginaceae | <i>Bougainvillea spectabilis</i> var. <i>glabra</i> (Choisy) Hook.             | Bougainvillea (buganvilla, veranera)               | Cu                               | v           | orn | 1.5                           | 0.4                                  |                | X             | X                   |                  |                |               | X                   | X                |
| Nyctaginaceae | <i>Bougainvillea spectabilis</i> var. <i>spectabilis</i> Willd.                | Bougainvillea (buganvilla, veranera)               | Cu                               | v           | orn |                               | 0.1                                  |                |               |                     |                  |                |               |                     | X                |
| Nyctaginaceae | <i>Bougainvillea x buttiana</i> Holtum & Standl.                               | (buganvilla, veranera)                             | Cu                               | sh          | orn | 4.6                           | 4.0                                  | X              | X             | X                   | X                | X              | X             | X                   | X                |
| Nyctaginaceae | <i>Mirabilis jalapa</i> L.                                                     | Marvel of Peru, Four O'Clock Plant (buenas tardes) | Es                               | h           | orn | 16.1                          | 3.5                                  |                | X             | X                   | X                |                | X             | X                   | X                |
| Nymphaeaceae  | <i>Nymphaea capensis</i> var. <i>zanzibarensis</i> (Casp.) Conard <sup>1</sup> |                                                    | Cu                               | h           | orn |                               | nfs                                  |                |               |                     |                  |                |               |                     | X                |
| Oleaceae      | <i>Chionanthus pubescens</i> Kunth                                             | (arupo)                                            | Cu                               | t           | orn | 0.4                           |                                      |                |               | X                   | X                |                |               |                     |                  |
| Oleaceae      | <i>Fraxinus uhdei</i> (Wenz.) Lingelsh. <sup>1</sup>                           |                                                    | Cu                               | t           | non | 0.2                           |                                      |                |               | X                   |                  |                |               |                     |                  |
| Oleaceae      | <i>Jasminum azoricum</i> L. <sup>1</sup>                                       |                                                    | Cu                               | v           | orn |                               | nfs                                  |                |               |                     |                  |                |               |                     | X                |
| Oleaceae      | <i>Jasminum grandiflorum</i> L.                                                |                                                    | Cu                               | v           | orn | 0.5                           | 0.6                                  |                |               | X                   | X                |                |               | X                   |                  |
| Oleaceae      | <i>Jasminum sambac</i> (L.) Aiton <sup>1</sup>                                 |                                                    | Cu                               | sh          | orn |                               | <0.1                                 |                |               |                     |                  |                |               | X                   |                  |

| Family         | Species name                                                                  | Common name English (local-Spanish) | Introduction status in Galapagos | Growth form | Use | % of visited rural properties | % of fully surveyed urban properties | Floreana_rural | Isabela_rural | San Cristobal_rural | Santa Cruz_rural | Floreana_urban | Isabela_urban | San Cristobal_urban | Santa Cruz_urban |
|----------------|-------------------------------------------------------------------------------|-------------------------------------|----------------------------------|-------------|-----|-------------------------------|--------------------------------------|----------------|---------------|---------------------|------------------|----------------|---------------|---------------------|------------------|
| Oleaceae       | <i>Olea europaea</i> L. <sup>1</sup>                                          | Olive (oliva)                       | Cu                               | t           | edi | 0.2                           |                                      |                | X             |                     |                  |                |               |                     |                  |
| Orchidaceae    | <i>Cattleya maxima</i> Lindl.                                                 |                                     | Cu                               | h           | orn | 0.4                           | nfs                                  |                |               |                     | X                |                |               |                     | X                |
| Orchidaceae    | <i>Stanhopea jensischiana</i> Kramer ex Rchb. f.                              | (torito, cabeza de toro)            | Cu                               | h           | orn | 0.5                           |                                      |                |               |                     | X                |                |               |                     |                  |
| Oxalidaceae    | <i>Averrhoa carambola</i> L. <sup>1</sup>                                     | starfruit (carambola)               | Cu                               | t           | edi | 0.9                           |                                      |                |               | X                   |                  |                |               |                     |                  |
| Oxalidaceae    | <i>Oxalis corniculata</i> L.                                                  |                                     | AcQ                              | h           | non | *73.4                         | 4.5                                  | X              | X             | X                   | X                | X              | X             | X                   | X                |
| Oxalidaceae    | <i>Oxalis corymbosa</i> DC.                                                   |                                     | Es                               | h           | non | 46.0                          | 4.9                                  | X              | X             | X                   | X                | X              |               | X                   | X                |
| Oxalidaceae    | <i>Oxalis latifolia</i> Kunth <sup>1</sup>                                    |                                     | AcQ                              | h           | orn | 0.7                           | <0.1                                 |                |               |                     | X                |                |               |                     | X                |
| Oxalidaceae    | <i>Oxalis triangularis</i> A. St.-Hil. <sup>1</sup>                           |                                     | Cu                               | h           | orn |                               | 0.1                                  |                |               |                     |                  |                |               | X                   |                  |
| Oxalidaceae    | <i>Oxalis tuberosa</i> Molina <sup>1</sup>                                    | (oca)                               | Cu                               | h           | edi |                               | <0.1                                 |                |               |                     |                  |                |               |                     | X                |
| Pandanaceae    | <i>Pandanus tectorius</i> var. <i>sinensis</i> Warb. in Engl. <sup>1</sup>    |                                     | Cu                               | sh          | orn | 0.7                           | 0.7                                  |                |               | X                   | X                |                |               | X                   | X                |
| Papaveraceae   | <i>Argemone mexicana</i> L.                                                   |                                     | Es                               | h           | non | 7.0                           | 1.4                                  |                |               | X                   |                  |                |               | X                   |                  |
| Passifloraceae | <i>Passiflora edulis</i> Sims                                                 | Maracuya (maracuyá)                 | Es                               | v           | edi | *82.1                         | 6.6                                  | X              | X             | X                   | X                | X              | X             | X                   | X                |
| Passifloraceae | <i>Passiflora ligularis</i> Juss.                                             | (granadilla)                        | Es                               | v           | edi | 13.7                          |                                      |                | X             | X                   | X                |                |               |                     |                  |
| Passifloraceae | <i>Passiflora maliformis</i> L. <sup>1</sup>                                  | (chalupa)                           | Es                               | v           | edi | 1.3                           |                                      |                |               | X                   |                  |                |               |                     |                  |
| Passifloraceae | <i>Passiflora quadrangularis</i> L.                                           | (badea)                             | Es                               | v           | edi | 12.8                          | 1.1                                  | X              | X             | X                   |                  |                |               | X                   | X                |
| Phytolaccaceae | <i>Phytolacca americana</i> L. <sup>1</sup>                                   | (ginseng)                           | Cu                               | ssh         | med | 1.1                           | <0.1                                 |                |               | X                   |                  |                |               | X                   |                  |
| Pinaceae       | <i>Pinus radiata</i> D. Don                                                   | (pino)                              | Cu                               | t           | orn | 0.5                           |                                      |                |               | X                   | X                |                |               |                     |                  |
| Piperaceae     | <i>Peperomia fraseri</i> C. DC. <sup>1</sup>                                  |                                     | Cu                               | h           | orn | 0.2                           | 0.1                                  |                |               | X                   |                  |                |               | X                   |                  |
| Piperaceae     | <i>Peperomia macrostachya</i> (Vahl) A. Dietr. <sup>1</sup>                   |                                     | Cu                               | s           | orn | 1.1                           | 0.4                                  |                |               | X                   | X                |                |               |                     | X                |
| Piperaceae     | <i>Peperomia obtusifolia</i> (L.) A. Dietr. <sup>1</sup>                      |                                     | Cu                               | s           | orn | 0.4                           | 1.5                                  |                |               | X                   |                  | X              |               | X                   | X                |
| Piperaceae     | <i>Peperomia</i> sp. 2 <sup>1</sup>                                           |                                     | Cu                               | h           | orn |                               | <0.1                                 |                |               |                     |                  |                | X             |                     |                  |
| Piperaceae     | <i>Piper aduncum</i> L.                                                       |                                     | Es                               | sh          | orn | 1.3                           | <0.1                                 |                | X             | X                   | X                |                |               | X                   |                  |
| Piperaceae     | <i>Piper peltatum</i> L.                                                      | (cachimuela, Santa María)           | Es                               | h           | non | 17.6                          |                                      |                | X             |                     | X                |                |               |                     |                  |
| Plantaginaceae | <i>Plantago major</i> L.                                                      | Greater Plantain (llantén)          | Ac                               | h           | med | 33.9                          | 8.7                                  | X              | X             | X                   | X                | X              | X             | X                   | X                |
| Plumbaginaceae | <i>Plumbago auriculata</i> Lam. <sup>1</sup>                                  |                                     | Cu                               | h           | orn | 0.2                           | 0.2                                  |                |               | X                   |                  |                |               | X                   | X                |
| Poaceae        | <i>Arthrostylidium pubescens</i> Rupr. <sup>1</sup>                           |                                     | Cu                               | sh          | non | 0.2                           |                                      |                |               |                     | X                |                |               |                     |                  |
| Poaceae        | <i>Arundo donax</i> L. <sup>1</sup>                                           | (carrizo)                           | Cu                               | h           | orn | 2.6                           |                                      | X              | X             | X                   | X                |                |               |                     |                  |
| Poaceae        | <i>Axonopus compressus</i> (Sw.) P. Beauv.                                    |                                     | Ac                               | h           | non | 15.0                          |                                      |                |               | X                   |                  |                |               |                     |                  |
| Poaceae        | <i>Axonopus micay</i> García-Barr.                                            | (micay)                             | Ac                               | h           | oth | 0.7                           |                                      |                | X             | X                   |                  |                |               |                     |                  |
| Poaceae        | <i>Bambusa</i> sp. 1 <sup>1</sup>                                             | (caña)                              | Cu                               | t           | tim | 0.7                           |                                      |                |               | X                   |                  |                |               |                     |                  |
| Poaceae        | <i>Bambusa vulgaris</i> var. <i>vittata</i> Rivière & C. Rivière <sup>1</sup> | Yellow bamboo (caña amarilla)       | Cu                               | t           | orn | 2.7                           | <0.1                                 |                |               | X                   |                  |                |               | X                   |                  |
| Poaceae        | <i>Bambusa vulgaris</i> var. <i>vulgaris</i> <sup>1</sup>                     | bamboo (caña verde)                 | Cu                               | t           | tim | 2.2                           |                                      |                |               | X                   |                  |                |               |                     |                  |
| Poaceae        | <i>Cenchrus brownii</i> Roem. & Schult. <sup>1</sup>                          |                                     | Ac                               | h           | non | 0.2                           | nfs                                  |                |               | X                   |                  |                |               |                     | X                |
| Poaceae        | <i>Cenchrus echinatus</i> L.                                                  |                                     | Ac                               | h           | non | 1.8                           | 6.6                                  |                | X             | X                   |                  |                | X             | X                   |                  |
| Poaceae        | <i>Chloris inflata</i> Link                                                   |                                     | AcQ                              | h           | non | 1.5                           | 15.4                                 | X              |               | X                   |                  |                |               | X                   | X                |
| Poaceae        | <i>Chloris radiata</i> (L.) Sw.                                               |                                     | NaQ                              | h           | non | 1.5                           | 0.8                                  |                | X             | X                   | X                |                |               |                     | X                |
| Poaceae        | <i>Coix lacryma-jobi</i> L.                                                   | Job's Tears (lagrima de san Pedro)  | Es                               | h           | non | 1.3                           |                                      |                |               | X                   |                  |                |               |                     |                  |

| Family  | Species name                                                 | Common name English (local-Spanish)          | Introduction status in Galapagos | Growth form | Use | % of visited rural properties | % of fully surveyed urban properties | Floreana_rural | Isabela_rural | San Cristobal_rural | Santa Cruz_rural | Floreana_urban | Isabela_urban | San Cristobal_urban | Santa Cruz_urban |
|---------|--------------------------------------------------------------|----------------------------------------------|----------------------------------|-------------|-----|-------------------------------|--------------------------------------|----------------|---------------|---------------------|------------------|----------------|---------------|---------------------|------------------|
| Poaceae | <i>Cymbopogon citratus</i> (DC.) Stapf                       | Lemon Grass (hierba Luisa)                   | Cu                               | h           | med | 28.4                          | 11.7                                 | X              | X             | X                   | X                | X              | X             | X                   | X                |
| Poaceae | <i>Cynodon dactylon</i> (L.) Pers.                           |                                              | Es                               | h           | oth | 6.0                           | 2.2                                  | X              | X             | X                   | X                | X              | X             | X                   | X                |
| Poaceae | <i>Cynodon nlemfuensis</i> Vanderyst                         | (pasto estrella)                             | Ac                               | h           | oth | 9.0                           |                                      |                |               | X                   |                  |                |               |                     |                  |
| Poaceae | <i>Dactyloctenium aegyptium</i> (L.) Willd.                  |                                              | Ac                               | h           | non |                               | 0.5                                  |                |               |                     |                  |                | X             | X                   | X                |
| Poaceae | <i>Digitaria ciliaris</i> (Retz.) Koeler                     |                                              | NaQ                              | h           | non | 2.7                           | 1.6                                  | X              |               | X                   |                  | X              | X             | X                   | X                |
| Poaceae | <i>Digitaria eriantha</i> Steud.                             | (pasto pangola)                              | Es                               | h           | oth | 1.3                           | 0.3                                  |                |               | X                   | X                |                |               |                     | X                |
| Poaceae | <i>Digitaria horizontalis</i> Willd.                         |                                              | Ac                               | h           | non | 65.8                          | 2.5                                  | X              | X             | X                   | X                | X              | X             | X                   | X                |
| Poaceae | <i>Digitaria setigera</i> Roth                               |                                              | Ac                               | h           | non | 39.0                          | 0.5                                  | X              | X             | X                   | X                |                | X             | X                   | X                |
| Poaceae | <i>Echinochloa colona</i> (L.) Link                          |                                              | Ac                               | h           | non |                               | 0.1                                  |                |               |                     |                  |                |               | X                   |                  |
| Poaceae | <i>Echinochloa crus-galli</i> (L.) P. Beauv.                 |                                              | Es                               | h           | non | 0.2                           | 0.1                                  |                |               | X                   |                  |                |               |                     | X                |
| Poaceae | <i>Eleusine indica</i> (L.) Gaertn.                          |                                              | Ac                               | h           | non | 61.4                          | *20.1                                | X              | X             | X                   | X                | X              | X             | X                   | X                |
| Poaceae | <i>Eragrostis amabilis</i> (L.) Wight & Arn. ex Nees         |                                              | Ac                               | h           | non | 3.5                           | 4.7                                  |                | X             | X                   |                  |                | X             | X                   | X                |
| Poaceae | <i>Eragrostis cilianensis</i> (All.) Vignolo ex Janch.       |                                              | NaQ                              | h           | non | 0.2                           |                                      |                |               | X                   |                  |                |               |                     |                  |
| Poaceae | <i>Eragrostis tenuifolia</i> (A. Rich.) Hochst. ex Steud.    |                                              | Ac                               | h           | non | 3.1                           | 2.3                                  |                | X             |                     |                  |                |               | X                   |                  |
| Poaceae | <i>Guadua angustifolia</i> Kunth                             | Bamboo (guadua, caña brava)                  | Es                               | t           | tim | 20.7                          | 0.1                                  | X              | X             | X                   | X                |                |               | X                   |                  |
| Poaceae | <i>Gynerium sagittatum</i> (Aublet) P. Beauv.                | Saw Grass (caña brava)                       | AcQ                              | h           | oth | 0.2                           |                                      |                |               | X                   |                  |                |               |                     |                  |
| Poaceae | <i>Ichnanthus nemorosus</i> (Sw.) Döll                       |                                              | NaQ                              | h           | non | 3.3                           |                                      |                | X             |                     |                  |                |               |                     |                  |
| Poaceae | <i>Leptochloa mucronata</i> (Michx.) Kunth                   |                                              | NaQ                              | h           | non |                               | <0.1                                 |                |               |                     |                  |                |               |                     | X                |
| Poaceae | <i>Lolium perenne</i> L. <sup>1</sup>                        |                                              | Es                               | h           | non | 0.4                           |                                      |                |               | X                   |                  |                |               |                     |                  |
| Poaceae | <i>Melinis minutiflora</i> P. Beauv.                         | Molasses Grass (pasto miel)                  | Es                               | h           | non | 4.9                           |                                      |                |               | X                   | X                |                |               |                     |                  |
| Poaceae | <i>Oplismenus setarius</i> (Lam.) Roem. & Schult             |                                              | NaQ                              | h           | non | 35.2                          | <0.1                                 |                | X             | X                   | X                |                |               |                     | X                |
| Poaceae | <i>Oryza sativa</i> L.                                       | Rice (arroz)                                 | Cu                               | h           | edi |                               | <0.1                                 |                |               |                     |                  |                |               |                     | X                |
| Poaceae | <i>Panicum maximum</i> Jacq.                                 | Guinea Grass (pasto sabolla, pasto Tanzania) | Es                               | h           | oth | 24.7                          | 1.6                                  | X              | X             | X                   | X                |                |               | X                   | X                |
| Poaceae | <i>Panicum polygonatum</i> Schrad.                           |                                              | Ac                               | h           | non | 0.5                           |                                      |                |               | X                   | X                |                |               |                     |                  |
| Poaceae | <i>Paspalum conjugatum</i> Bergius                           | Sourgrass (pasto de burro)                   | NaQ                              | h           | non | 65.0                          | 0.6                                  | X              | X             | X                   | X                |                |               | X                   | X                |
| Poaceae | <i>Pennisetum purpureum</i> Schumach.                        | Elephant Grass (pasto elefante)              | Es                               | h           | oth | 62.1                          | 0.2                                  | X              | X             | X                   | X                |                | X             | X                   | X                |
| Poaceae | <i>Phyllostachys aurea</i> Rivière & C. Rivière <sup>1</sup> |                                              | Cu                               | h           | orn | 0.4                           |                                      |                |               |                     | X                |                |               |                     |                  |
| Poaceae | <i>Poa annua</i> L.                                          |                                              | AcQ                              | h           | non | 0.2                           |                                      |                | X             |                     |                  |                |               |                     |                  |
| Poaceae | <i>Pogonatherum paniceum</i> (Lam.) Hack. <sup>1</sup>       | (bambú enano)                                | Cu                               | h           | orn | 0.4                           | 0.4                                  |                |               | X                   |                  |                |               | X                   | X                |
| Poaceae | <i>Saccharum officinarum</i> L.                              | Sugarcane (caña de azúcar)                   | Cu                               | h           | edi | 25.6                          | 1.3                                  | X              | X             | X                   | X                | X              | X             | X                   | X                |

| Family        | Species name                                                | Common name English (local-Spanish) | Introduction status in Galapagos | Growth form | Use | % of visited rural properties | % of fully surveyed urban properties | Floreana_rural | Isabela_rural | San Cristobal_rural | Santa Cruz_rural | Floreana_urban | Isabela_urban | San Cristobal_urban | Santa Cruz_urban |
|---------------|-------------------------------------------------------------|-------------------------------------|----------------------------------|-------------|-----|-------------------------------|--------------------------------------|----------------|---------------|---------------------|------------------|----------------|---------------|---------------------|------------------|
| Poaceae       | <i>Setaria sphacelata</i> (Scumach.) Moss                   | (pasto miel (en San Cristóbal))     | Cu                               | h           | oth | 7.5                           |                                      |                |               | X                   | X                |                |               |                     |                  |
| Poaceae       | <i>Sorghum arundinaceum</i> (Desv.) Stapf                   | (sorgo)                             | Cu                               | h           | non | 0.2                           | 0.5                                  |                |               | X                   |                  |                |               | X                   | X                |
| Poaceae       | <i>Sporobolus tenuissimus</i> (Schränk) Kuntze              |                                     | Ac                               | h           | non | 11.5                          |                                      |                |               | X                   |                  |                |               |                     |                  |
| Poaceae       | <i>Urochloa brizantha</i> x <i>ruziensis</i> <sup>1</sup>   | (pasto Mulato)                      | Cu                               | h           | oth | 0.5                           |                                      |                |               | X                   |                  |                |               |                     |                  |
| Poaceae       | <i>Urochloa decumbens</i> (Stapf) R.D. Webster              | (braquiaria)                        | Es                               | h           | oth | 7.0                           |                                      |                | X             | X                   | X                |                |               |                     |                  |
| Poaceae       | <i>Urochloa mutica</i> (Forssk.) T.Q. Nguyen                | Pará Grass (janeiro)                | Es                               | h           | non | 0.7                           | 0.1                                  |                |               | X                   | X                |                |               |                     | X                |
| Poaceae       | <i>Zea mays</i> L.                                          | Maize (maiz)                        | Cu                               | h           | edi | 23.6                          | 1.5                                  | X              | X             | X                   | X                |                | X             | X                   | X                |
| Poaceae       | <i>Zoysia matrella</i> var. <i>pacifica</i> Goudwaard       | (césped chino)                      | Es                               | h           | orn | 1.6                           | 8.4                                  |                | X             | X                   |                  |                | X             | X                   | X                |
| Polemoniaceae | <i>Phlox drummondii</i> Hook.                               |                                     | Es                               | h           | orn | 0.2                           | 0.1                                  |                |               |                     | X                |                |               | X                   |                  |
| Polygonaceae  | <i>Antigonon leptopus</i> Hook. & Arn.                      | Coral Vine (corazón bello)          | Es                               | v           | orn | 1.3                           | 0.8                                  | X              | X             | X                   | X                | X              | X             | X                   | X                |
| Polygonaceae  | <i>Triplaris cumingiana</i> Fisch. & C.A. Mey. ex C.A. Mey. | (Fernansánchez)                     | Cu                               | t           | tim | 9.0                           |                                      |                | X             | X                   |                  |                |               |                     |                  |
| Polypodiaceae | <i>Platyterium</i> sp. 1 <sup>1</sup>                       |                                     | Cu                               | h           | orn | 0.2                           | 0.2                                  |                |               |                     | X                |                |               | X                   | X                |
| Portulacaceae | <i>Portulaca grandiflora</i> Hook.                          | (beso de un día, flor de un día)    | Cu                               | s           | orn | 2.9                           | 5.2                                  |                | X             | X                   | X                | X              | X             | X                   | X                |
| Portulacaceae | <i>Portulaca oleracea</i> L.                                | Purslane (verdolaga)                | NaQ                              | s           | med | 19.6                          | *27.2                                | X              | X             | X                   | X                |                | X             | X                   | X                |
| Portulacaceae | <i>Portulaca pilosa</i> L. <sup>1</sup>                     |                                     | Cu                               | s           | orn | 0.9                           | 0.4                                  |                | X             | X                   |                  | X              | X             | X                   | X                |
| Portulacaceae | <i>Portulaca umbraticola</i> Kunth                          | (amor del día)                      | Cu                               | s           | orn | 4.8                           | 2.9                                  |                | X             | X                   | X                | X              | X             | X                   | X                |
| Portulacaceae | <i>Portulacaria afra</i> L. (Jacq.) <sup>1</sup>            |                                     | Cu                               | ssh         | orn | 0.2                           |                                      |                |               |                     | X                |                |               |                     |                  |
| Portulacaceae | <i>Talinum paniculatum</i> (Jacq.) Gaertn.                  |                                     | Ac                               | h           | non | 15.4                          | 0.7                                  |                |               | X                   |                  |                |               | X                   | X                |
| Proteaceae    | <i>Grevillea robusta</i> A. Cunn. ex R. Br.                 |                                     | Cu                               | t           | oth | 1.3                           | <0.1                                 |                |               | X                   |                  |                |               | X                   |                  |
| Pteridaceae   | <i>Adiantum tenerum</i> Sw. <sup>1</sup>                    |                                     | Cu                               | h           | orn |                               | nfs                                  |                |               |                     |                  |                |               |                     | X                |
| Pteridaceae   | <i>Pteris ensiformis</i> Burm. f. <sup>1</sup>              |                                     | Cu                               | h           | orn | 0.2                           |                                      |                |               | X                   |                  |                |               |                     |                  |
| Punicaceae    | <i>Punica granatum</i> L.                                   | Pomegranate (granada)               | Cu                               | sh          | edi | 3.1                           | 1.5                                  |                | X             | X                   | X                | X              | X             | X                   | X                |
| Ranunculaceae | <i>Anemone coronaria</i> L.                                 |                                     | Cu                               | h           | orn | 0.2                           |                                      |                |               |                     | X                |                |               |                     |                  |
| Rosaceae      | <i>Eriobotrya japonica</i> (Thunb.) Lindl.                  | Loquat (nispero)                    | Es                               | t           | edi | 44.1                          | <0.1                                 | X              | X             | X                   | X                |                |               | X                   |                  |
| Rosaceae      | <i>Fragaria vesca</i> L.                                    | Strawberry (fresa)                  | Cu                               | h           | edi | 1.3                           | 0.1                                  |                |               | X                   |                  |                |               | X                   |                  |
| Rosaceae      | <i>Malus pumila</i> (L.) Mill.                              | Apple (manzana)                     | Cu                               | t           | edi | 4.0                           |                                      |                | X             | X                   |                  |                |               |                     |                  |
| Rosaceae      | <i>Prunus domestica</i> L. <sup>1</sup>                     | Plum (reina Claudia)                | Cu                               | t           | edi | 0.5                           |                                      |                | X             |                     |                  |                |               |                     |                  |
| Rosaceae      | <i>Prunus persica</i> (L.) Batsch                           | Peach (durazno)                     | Cu                               | sh          | edi | 0.4                           |                                      |                |               | X                   |                  |                |               |                     |                  |
| Rosaceae      | <i>Prunus serotina</i> ssp. <i>capuli</i> (Cav.) McVaugh    | (capulí)                            | Cu                               | t           | edi | 0.2                           |                                      |                |               | X                   |                  |                |               |                     |                  |
| Rosaceae      | <i>Prunus</i> sp. 1 <sup>1</sup>                            |                                     | Cu                               | t           | edi | 0.4                           |                                      |                | X             |                     |                  |                |               |                     |                  |
| Rosaceae      | <i>Prunus</i> sp. 2 <sup>1</sup>                            | (cereza)                            | Cu                               | t           | edi | 0.4                           |                                      |                | X             |                     | X                |                |               |                     |                  |
| Rosaceae      | <i>Pyrus communis</i> L.                                    | Pear (pera)                         | Cu                               | t           | edi | 0.4                           |                                      |                |               | X                   | X                |                |               |                     |                  |
| Rosaceae      | <i>Rosa</i> hybrid cultivars                                | Rose (rosa)                         | Cu                               | ssh         | orn | 18.9                          | 6.7                                  | X              | X             | X                   | X                | X              | X             | X                   | X                |
| Rosaceae      | <i>Rubus glaucus</i> Benth.                                 | (mora de Castilla)                  | Es                               | sh          | edi |                               | <0.1                                 |                |               |                     |                  |                |               | X                   |                  |
| Rosaceae      | <i>Rubus niveus</i> Thunb.                                  | (mora)                              | Es                               | sh          | edi | 54.8                          | 0.1                                  |                | X             | X                   | X                |                |               | X                   | X                |

| Family           | Species name                                                                     | Common name English (local-Spanish)  | Introduction status in Galapagos | Growth form | Use | % of visited rural properties | % of fully surveyed urban properties | Floreana_rural | Isabela_rural | San Cristobal_rural | Santa Cruz_rural | Floreana_urban | Isabela_urban | San Cristobal_urban | Santa Cruz_urban |
|------------------|----------------------------------------------------------------------------------|--------------------------------------|----------------------------------|-------------|-----|-------------------------------|--------------------------------------|----------------|---------------|---------------------|------------------|----------------|---------------|---------------------|------------------|
| Rosaceae         | <i>Rubus ulmifolius</i> Schott.                                                  |                                      | Es                               | sh          | non | 0.2                           |                                      |                | X             |                     |                  |                |               |                     |                  |
| Rubiaceae        | <i>Cinchona pubescens</i> Vahl                                                   | Red Quinine (cascarilla, cinchona)   | Es                               | t           | tim | 0.9                           |                                      |                |               | X                   | X                |                |               |                     |                  |
| Rubiaceae        | <i>Coffea arabica</i> L.                                                         | Coffee (café)                        | Es                               | sh          | edi | 62.5                          | <0.1                                 | X              | X             | X                   | X                |                |               | X                   | X                |
| Rubiaceae        | <i>Gardenia augusta</i> (L.) Merr. <sup>1</sup>                                  | Gardenia (gardenia)                  | Cu                               | sh          | orn | 0.4                           | <0.1                                 |                |               |                     | X                |                |               |                     | X                |
| Rubiaceae        | <i>Ixora casei</i> Hance <sup>1</sup>                                            |                                      | Cu                               | sh          | orn |                               | nfs                                  |                |               |                     |                  |                |               |                     | X                |
| Rubiaceae        | <i>Ixora coccinea</i> L. <sup>1</sup>                                            |                                      | Cu                               | sh          | orn | 0.7                           | 0.9                                  |                |               | X                   | X                |                |               | X                   | X                |
| Rubiaceae        | <i>Ixora finlaysoniana</i> Wall. ex G. Don <sup>1</sup>                          |                                      | Cu                               | sh          | orn |                               | 0.1                                  |                |               |                     |                  |                |               |                     | X                |
| Rubiaceae        | <i>Morinda citrifolia</i> L. <sup>1</sup>                                        | (noni)                               | Cu                               | ssh         | med | 1.6                           | 0.5                                  |                |               | X                   |                  |                |               | X                   |                  |
| Rubiaceae        | <i>Mussaenda philippica</i> A. Rich. <sup>1</sup>                                |                                      | Cu                               | sh          | orn |                               | 0.3                                  |                |               |                     |                  |                |               | X                   |                  |
| Rubiaceae        | <i>Pentas lanceolata</i> (Forssk.) Deflers <sup>1</sup>                          |                                      | Cu                               | h           | orn |                               | <0.1                                 |                |               |                     |                  |                |               | X                   |                  |
| Rubiaceae        | <i>Posoqueria coriacea</i> ssp. <i>formosa</i> (H. Karst.) Steyerl. <sup>1</sup> |                                      | Cu                               | t           | orn | 0.2                           |                                      |                |               |                     | X                |                |               |                     |                  |
| Rutaceae         | <i>Citrus medica</i> L.                                                          | (citrón)                             | Cu                               | t           | edi | 26.9                          | 0.4                                  |                | X             | X                   | X                | X              | X             | X                   | X                |
| Rutaceae         | <i>Citrus reticulata</i> Blanco                                                  | Tangerine, Mandarin (mandarina fina) | Cu                               | t           | edi | 39.7                          | 0.8                                  | X              | X             | X                   | X                | X              | X             | X                   | X                |
| Rutaceae         | <i>Citrus</i> x "limon-mandarina" <sup>1</sup>                                   | (limón-mandarina)                    | Cu                               | t           | edi | 6.0                           | 0.2                                  |                | X             | X                   |                  |                | X             |                     |                  |
| Rutaceae         | <i>Citrus</i> x "naranja-lima" <sup>1</sup>                                      |                                      | Cu                               | t           | edi | 0.2                           |                                      |                | X             |                     |                  |                |               |                     |                  |
| Rutaceae         | <i>Citrus</i> x <i>aurantiifolia</i> (Christm.) Swingle                          | Lime (limón, limón verde)            | Es                               | t           | edi | 3.8                           | 0.4                                  |                | X             | X                   |                  |                | X             | X                   | X                |
| Rutaceae         | <i>Citrus</i> x <i>aurantium</i> L.                                              | Seville Orange (naranja amarga)      | Cu                               | t           | edi | 3.7                           | 0.3                                  | X              | X             | X                   | X                |                |               |                     | X                |
| Rutaceae         | <i>Citrus</i> x <i>limetta</i> Risso                                             | Sweet Lime (lima, limón dulce)       | Es                               | t           | edi | 16.1                          | 0.1                                  | X              | X             | X                   | X                |                |               | X                   |                  |
| Rutaceae         | <i>Citrus</i> x <i>limon</i> (L.) Osbeck                                         | Lemon (limón amarillo, limón sutil)  | Es                               | t           | edi | 18.5                          | 1.3                                  | X              | X             | X                   | X                | X              | X             | X                   | X                |
| Rutaceae         | <i>Citrus</i> x <i>nobilis</i> Lour.                                             | (mandarina, tangor)                  | Cu                               | t           | edi | 12.6                          | <0.1                                 |                |               | X                   |                  |                |               |                     | X                |
| Rutaceae         | <i>Citrus</i> x <i>paradisi</i> Macfad.                                          | Grapefruit (toronja)                 | Cu                               | t           | edi | 18.9                          | 0.2                                  | X              | X             | X                   | X                |                | X             | X                   | X                |
| Rutaceae         | <i>Citrus</i> x <i>sinensis</i> (L.) Osbeck                                      | Sweet Orange (naranja dulce)         | Cu                               | t           | edi | *76.6                         | 2.0                                  | X              | X             | X                   | X                | X              | X             | X                   | X                |
| Rutaceae         | <i>Murraya paniculata</i> (L.) Jack <sup>1</sup>                                 | (flor de ramo)                       | Cu                               | sh          | orn | 0.4                           | nfs                                  |                |               |                     | X                |                |               |                     | X                |
| Rutaceae         | <i>Ruta graveolens</i> L.                                                        | Rue (ruda)                           | Cu                               | ssh         | med | 14.8                          | 5.1                                  |                | X             | X                   | X                | X              | X             | X                   | X                |
| Sapindaceae      | <i>Melicoccus bijugatus</i> Jacq. <sup>1</sup>                                   | (mamón)                              | Es                               | t           | orn | 0.7                           |                                      |                | X             |                     |                  |                |               |                     |                  |
| Sapindaceae      | <i>Sapindus saponaria</i> L.                                                     | Soapberry (jaboncillo)               | Es                               | t           | tim | 21.6                          |                                      | X              | X             | X                   |                  |                |               |                     |                  |
| Sapotaceae       | <i>Chrysophyllum argenteum</i> ssp. <i>panamense</i> (Pittier) T.D. Penn.        | (caimito)                            | Cu                               | t           | edi | 9.9                           |                                      |                | X             | X                   |                  |                |               |                     |                  |
| Sapotaceae       | <i>Chrysophyllum cainito</i> L.                                                  | (caimito, mamey)                     | Cu                               | t           | edi | 0.2                           |                                      |                |               |                     | X                |                |               |                     |                  |
| Sapotaceae       | <i>Pouteria sapota</i> (Jacq.) H.E. Moore & Stearn <sup>1</sup>                  | (mamey serrano)                      | Cu                               | t           | edi | 0.5                           |                                      |                |               | X                   |                  |                |               |                     |                  |
| Scrophulariaceae | <i>Angelonia gardneri</i> Hook. <sup>1</sup>                                     |                                      | Cu                               | h           | orn |                               | nfs                                  |                |               |                     |                  |                |               |                     | X                |
| Scrophulariaceae | <i>Antirrhinum majus</i> L.                                                      | Snapdragon (perritos)                | Cu                               | h           | orn |                               | <0.1                                 |                |               |                     |                  |                |               | X                   |                  |

| Family           | Species name                                                                            | Common name English (local-Spanish)         | Introduction status in Galapagos | Growth form | Use | % of visited rural properties | % of fully surveyed urban properties | Floreana_rural | Isabela_rural | San Cristobal_rural | Santa Cruz_rural | Floreana_urban | Isabela_urban | San Cristobal_urban | Santa Cruz_urban |
|------------------|-----------------------------------------------------------------------------------------|---------------------------------------------|----------------------------------|-------------|-----|-------------------------------|--------------------------------------|----------------|---------------|---------------------|------------------|----------------|---------------|---------------------|------------------|
| Scrophulariaceae | <i>Lindernia</i> sp. 1                                                                  | (té verde)                                  | Cu                               | h           | orn |                               | 0.4                                  |                |               |                     |                  |                |               | X                   |                  |
| Scrophulariaceae | <i>Russelia equisetiformis</i> Schlttdl. & Cham.                                        | (lluvia de fuego, lluvia de coral)          | Cu                               | sh          | orn | 3.5                           | 1.1                                  |                | X             | X                   | X                |                | X             | X                   | X                |
| Scrophulariaceae | <i>Stemodia verticillata</i> (Mill.) Hassl.                                             |                                             | AcQ                              | h           | non | 1.8                           |                                      |                |               | X                   |                  |                |               |                     |                  |
| Scrophulariaceae | <i>Veronica persica</i> Poir.                                                           |                                             | Ac                               | h           | non | 4.6                           |                                      | X              | X             | X                   | X                |                |               |                     |                  |
| Selaginellaceae  | <i>Selaginella oaxacana</i> Spring <sup>1</sup>                                         |                                             | Cu                               | h           | orn | 0.4                           |                                      |                |               | X                   |                  |                |               |                     |                  |
| Solanaceae       | <i>Browallia americana</i> L.                                                           |                                             | AcQ                              | h           | non | 8.4                           | 0.2                                  | X              | X             | X                   | X                |                |               | X                   | X                |
| Solanaceae       | <i>Brugmansia suaveolens</i> (Humb. & Bonpl. ex Willd.) Bercht. & J. Presl <sup>1</sup> | (floripondio)                               | Cu                               | sh          | orn | 0.2                           | <0.1                                 |                |               | X                   |                  |                |               |                     | X                |
| Solanaceae       | <i>Brugmansia versicolor</i> Lagerh. <sup>1</sup>                                       | (floripondio, campana)                      | Es                               | sh          | orn | 14.1                          | 1.1                                  | X              | X             | X                   | X                |                |               | X                   | X                |
| Solanaceae       | <i>Brugmansia x candida</i> Pers.                                                       | (guanto, floripondio)                       | Es                               | sh          | orn | 19.2                          | 0.3                                  |                |               | X                   |                  |                | X             |                     | X                |
| Solanaceae       | <i>Brunfelsia grandiflora</i> D. Don                                                    | (variable)                                  | Cu                               | sh          | orn | 5.7                           | 0.1                                  |                | X             | X                   | X                |                |               | X                   | X                |
| Solanaceae       | <i>Capsicum annum</i> L.                                                                | Sweet Pepper (pimiento)                     | Cu                               | h           | edi | 16.1                          | 3.7                                  |                | X             | X                   | X                | X              | X             | X                   | X                |
| Solanaceae       | <i>Capsicum baccatum</i> var. <i>pendulum</i> Willd. <sup>1</sup>                       |                                             | Es                               | h           | edi | 0.5                           | nfs                                  |                | X             |                     |                  |                |               |                     | X                |
| Solanaceae       | <i>Capsicum frutescens</i> L.                                                           | Chili (ají)                                 | Es                               | h           | edi | 23.4                          | 4.5                                  | X              | X             | X                   | X                |                | X             | X                   | X                |
| Solanaceae       | <i>Cestrum auriculatum</i> L'Hér.                                                       | (sauco, dama olorosa, puta)                 | Es                               | sh          | non | 1.1                           |                                      |                |               |                     | X                |                |               |                     |                  |
| Solanaceae       | <i>Cestrum nocturnum</i> L.                                                             | Queen of the Night (galán de noche)         | Cu                               | sh          | orn | 0.4                           | 0.2                                  |                | X             |                     |                  |                |               | X                   |                  |
| Solanaceae       | <i>Datura innoxia</i> Mill.                                                             |                                             | Es                               | ssh         | orn |                               | <0.1                                 |                |               |                     |                  |                | X             |                     |                  |
| Solanaceae       | <i>Datura metel</i> L. <sup>1</sup>                                                     |                                             | Cu                               | h           | orn |                               | 0.2                                  |                |               |                     |                  |                | X             |                     | X                |
| Solanaceae       | <i>Datura stramonium</i> var. <i>stramonium</i> L.                                      | (chamico)                                   | Es                               | ssh         | non | 0.4                           |                                      |                | X             |                     |                  |                |               |                     |                  |
| Solanaceae       | <i>Datura stramonium</i> var. <i>tatula</i> (L.) Torr.                                  |                                             | Es                               | ssh         | orn | 0.2                           | 0.1                                  |                |               |                     | X                |                |               |                     | X                |
| Solanaceae       | <i>Nicandra physalodes</i> (L.) Gaertn.                                                 |                                             | Ac                               | ssh         | non | 13.4                          | 0.2                                  | X              | X             | X                   |                  |                |               | X                   |                  |
| Solanaceae       | <i>Nicotiana tabacum</i> L.                                                             | Tobacco (tabaco)                            | Es                               | h           | non | 8.4                           | 0.1                                  | X              | X             | X                   | X                | X              |               | X                   | X                |
| Solanaceae       | <i>Petunia hybrida</i> Vilm.                                                            | (petunia)                                   | Cu                               | h           | orn |                               | <0.1                                 |                |               |                     |                  |                |               | X                   | X                |
| Solanaceae       | <i>Physalis peruviana</i> L.                                                            | (uvilla)                                    | Es                               | h           | edi | 0.5                           |                                      |                | X             | X                   |                  |                |               |                     |                  |
| Solanaceae       | <i>Solandra grandiflora</i> Sw.                                                         |                                             | Cu                               | v           | orn | 1.1                           | 0.7                                  |                | X             | X                   | X                |                |               | X                   | X                |
| Solanaceae       | <i>Solanum americanum</i> Mill.                                                         | Black Nightshade (hierba mora)              | NaQ                              | h           | med | 52.4                          | 7.8                                  | X              | X             | X                   | X                | X              | X             | X                   | X                |
| Solanaceae       | <i>Solanum betaceum</i> Cav. <sup>1</sup>                                               | Tree Tomato, Tomatillo (tomate de árbol)    | Cu                               | sh          | edi | 18.9                          | 0.2                                  | X              | X             | X                   | X                |                | X             | X                   | X                |
| Solanaceae       | <i>Solanum capsicoides</i> All. <sup>1</sup>                                            | (tomatillo de montaña, falsa naranjilla)    | Cu                               | h           | orn | 1.5                           | 0.1                                  |                | X             | X                   |                  |                | X             |                     |                  |
| Solanaceae       | <i>Solanum lycopersicum</i> L.                                                          | Tomato (tomate riñón)                       | Es                               | h           | edi | 26.2                          | 9.0                                  | X              | X             | X                   | X                | X              | X             | X                   | X                |
| Solanaceae       | <i>Solanum melongena</i> L.                                                             | Aubergine, Garden Egg, Eggplant (berenjena) | Cu                               | sh          | edi | 2.4                           | 0.1                                  |                | X             | X                   | X                |                | X             |                     | X                |

| Family         | Species name                                               | Common name English (local-Spanish)                   | Introduction status in Galapagos | Growth form | Use | % of visited rural properties | % of fully surveyed urban properties | Floreana_rural | Isabela_rural | San Cristobal_rural | Santa Cruz_rural | Floreana_urban | Isabela_urban | San Cristobal_urban | Santa Cruz_urban |
|----------------|------------------------------------------------------------|-------------------------------------------------------|----------------------------------|-------------|-----|-------------------------------|--------------------------------------|----------------|---------------|---------------------|------------------|----------------|---------------|---------------------|------------------|
| Solanaceae     | <i>Solanum muricatum</i> Aiton <sup>1</sup>                | (pepino dulce)                                        | Cu                               | ssh         | edi | 0.4                           |                                      |                |               | X                   |                  |                |               |                     |                  |
| Solanaceae     | <i>Solanum pimpinellifolium</i> L.                         |                                                       | Es                               | h           | non | 7.0                           | 5.5                                  |                | X             | X                   | X                |                | X             | X                   | X                |
| Solanaceae     | <i>Solanum quitoense</i> Lam.                              | Lulo (naranjilla)                                     | Es                               | sh          | edi | 29.1                          | 1.3                                  | X              | X             | X                   | X                |                | X             | X                   | X                |
| Solanaceae     | <i>Solanum tuberosum</i> L.                                | Potato (papa)                                         | Cu                               | h           | edi | 11.4                          | 0.5                                  | X              | X             | X                   | X                |                | X             | X                   | X                |
| Solanaceae     | <i>Solanum wendlandii</i> Hook. f. <sup>1</sup>            |                                                       | Cu                               | v           | orn |                               | 0.1                                  |                |               |                     |                  |                |               | X                   |                  |
| Sterculiaceae  | <i>Guazuma ulmifolia</i> Lam.                              | (guasmo)                                              | Cu                               | t           | tim | 0.4                           |                                      |                | X             |                     |                  |                |               |                     |                  |
| Sterculiaceae  | <i>Theobroma cacao</i> L.                                  | Cocoa (cacao)                                         | Cu                               | t           | edi | 3.5                           |                                      |                |               | X                   | X                |                |               |                     |                  |
| Strelitziaceae | <i>Strelitzia reginae</i> Aiton <sup>1</sup>               | (ave del paraiso)                                     | Cu                               | h           | orn | 0.2                           | <0.1                                 |                |               | X                   |                  |                |               |                     | X                |
| Tiliaceae      | <i>Triumfetta semitriloba</i> Jacq.                        | (pegadillo)                                           | NaQ                              | h           | non | 36.8                          |                                      | X              | X             | X                   |                  |                |               |                     |                  |
| Tropaeolaceae  | <i>Tropaeolum majus</i> L.                                 | Nasturtium (mastuerzo)                                | Cu                               | v           | med | 2.2                           | 0.2                                  |                | X             | X                   | X                |                | X             | X                   | X                |
| Turneraceae    | <i>Turnera subulata</i> Sm. <sup>1</sup>                   |                                                       | Cu                               | h           | orn | 0.2                           | 0.6                                  |                |               | X                   |                  |                |               | X                   | X                |
| Turneraceae    | <i>Turnera ulmifolia</i> L. <sup>1</sup>                   |                                                       | Cu                               | h           | orn | 0.7                           | 1.3                                  |                |               | X                   | X                |                |               | X                   | X                |
| Ulmaceae       | <i>Trema micrantha</i> (L.) Blume                          | (sapan, huevos de paloma)                             | NaQ                              | t           | non | 7.0                           |                                      |                | X             |                     |                  |                |               |                     |                  |
| Urticaceae     | <i>Pilea depressa</i> (Sw.) Blume <sup>1</sup>             |                                                       | Cu                               | h           | orn | 3.3                           | 2.5                                  |                |               | X                   |                  |                |               | X                   | X                |
| Urticaceae     | <i>Pilea microphylla</i> (L.) Liebm.                       |                                                       | AcQ                              | h           | orn | 1.6                           | 0.1                                  |                | X             |                     | X                |                |               | X                   | X                |
| Urticaceae     | <i>Pilea nummulariifolia</i> (Sw.) Wedd. <sup>1</sup>      |                                                       | Cu                               | h           | orn |                               | 0.3                                  |                |               |                     |                  |                |               | X                   |                  |
| Urticaceae     | <i>Pilea serpyllacea</i> (Kunth) Liebm. <sup>1</sup>       |                                                       | Cu                               | h           | orn | 0.5                           | 2.5                                  |                |               | X                   |                  |                |               | X                   | X                |
| Urticaceae     | <i>Pilea</i> sp. 1 <sup>1</sup>                            |                                                       | AcQ                              | h           | orn |                               | <0.1                                 |                |               |                     |                  |                |               |                     | X                |
| Urticaceae     | <i>Urera baccifera</i> (L.) Gaudich. ex Wedd. <sup>1</sup> |                                                       | Cu                               | sh          | med | 0.2                           | <0.1                                 |                |               | X                   |                  |                |               | X                   |                  |
| Urticaceae     | <i>Urera caracasana</i> (Jacq.) Griseb.                    |                                                       | NaQ                              | ssh         | non | 0.4                           |                                      |                | X             |                     |                  |                |               |                     |                  |
| Valerianaceae  | <i>Valeriana chaerophylloides</i> Sm.                      | (valeriana)                                           | NaQ                              | v           | med | 25.6                          | 0.1                                  | X              | X             | X                   | X                |                |               |                     | X                |
| Verbenaceae    | <i>Aloysia triphylla</i> Royle                             | (cedrón)                                              | Cu                               | sh          | med | 0.2                           | 0.1                                  |                |               |                     | X                |                |               |                     | X                |
| Verbenaceae    | <i>Citharexylum gentryi</i> Moldenke                       | (sauco macho, palo de vaca)                           | Es                               | t           | tim | 0.2                           |                                      |                |               |                     | X                |                |               |                     |                  |
| Verbenaceae    | <i>Clerodendrum philippinum</i> Schauer                    |                                                       | Es                               | sh          | non | 6.2                           |                                      |                |               | X                   | X                |                |               |                     |                  |
| Verbenaceae    | <i>Clerodendrum thomsonae</i> Balf. <sup>1</sup>           | Bleeding Hearts (corazón de Cristo, sangre de Cristo) | Cu                               | v           | orn | 0.7                           | 1.0                                  |                | X             | X                   | X                |                | X             | X                   | X                |
| Verbenaceae    | <i>Clerodendrum x speciosum</i> Dombrain <sup>1</sup>      |                                                       | Cu                               | v           | orn |                               | 0.1                                  |                |               |                     |                  |                |               |                     | X                |
| Verbenaceae    | <i>Duranta repens</i> ssp. 1 L. <sup>1</sup>               | (San Jacinto)                                         | Cu                               | sh          | orn |                               | 0.1                                  |                |               |                     |                  |                |               | X                   | X                |
| Verbenaceae    | <i>Lantana camara</i> L.                                   | Curse of India, Koster's Curse (supirrosa)            | Es                               | sh          | non | 34.6                          | 13.8                                 | X              | X             | X                   | X                |                |               | X                   | X                |
| Verbenaceae    | <i>Lantana montevidensis</i> (Spreng.) Briq.               |                                                       | Cu                               | v           | med |                               | 0.1                                  |                |               |                     |                  |                |               | X                   | X                |
| Verbenaceae    | <i>Phyla nodiflora</i> var. <i>reptans</i> (HBK.) Moldenke |                                                       | NaQ                              | h           | non | 1.5                           | 0.1                                  | X              |               |                     |                  |                |               |                     | X                |
| Verbenaceae    | <i>Priva lappulacea</i> (L.) Pers.                         | (cadillo)                                             | Ac                               | h           | non | 46.9                          | 1.9                                  | X              | X             | X                   | X                | X              | X             | X                   | X                |
| Verbenaceae    | <i>Stachytarpheta cayennensis</i> (Rich.) M. Vahl          | (piche de gato, rabo de zorro)                        | AcQ                              | ssh         | non | *78.0                         | 0.5                                  | X              | X             | X                   | X                |                |               | X                   | X                |
| Verbenaceae    | <i>Tectona grandis</i> L. f.                               | Teak (teca)                                           | Cu                               | t           | tim | 4.9                           | <0.1                                 |                | X             | X                   | X                |                |               | X                   |                  |
| Verbenaceae    | <i>Verbena litoralis</i> Kunth                             | (verbena)                                             | NaQ                              | h           | non | 57.9                          | 0.1                                  | X              | X             | X                   | X                |                |               |                     | X                |



| Family         | Species name                                                             | Common name English (local-Spanish) | Introduction status in Galapagos | Growth form | Use | % of visited rural properties | % of fully surveyed urban properties | Floreana_rural | Isabela_rural | San Cristobal_rural | Santa Cruz_rural | Floreana_urban | Isabela_urban | San Cristobal_urban | Santa Cruz_urban |
|----------------|--------------------------------------------------------------------------|-------------------------------------|----------------------------------|-------------|-----|-------------------------------|--------------------------------------|----------------|---------------|---------------------|------------------|----------------|---------------|---------------------|------------------|
| Violaceae      | <i>Viola odorata</i> L.                                                  | Sweet Violet (violeta de jardin)    | Cu                               | h           | med | 0.4                           | 0.1                                  |                |               |                     | X                |                |               |                     | X                |
| Vitaceae       | <i>Vitis vinifera</i> L.                                                 | Grape (uva)                         | Cu                               | v           | edi | 3.3                           | 1.5                                  |                | X             | X                   | X                |                | X             | X                   | X                |
| Zingiberaceae  | <i>Alpinia purpurata</i> (Vieill.) K. Schum. <sup>1</sup>                |                                     | Cu                               | h           | orn | 0.9                           | 0.3                                  |                |               | X                   |                  |                |               | X                   | X                |
| Zingiberaceae  | <i>Alpinia sanderæ</i> Sander <sup>1</sup>                               |                                     | Cu                               | h           | orn | 0.9                           | <0.1                                 |                | X             | X                   | X                |                |               |                     | X                |
| Zingiberaceae  | <i>Alpinia zerumbet</i> (Pers.) B.L. Burtt & R.M. Sm.                    |                                     | Cu                               | h           | orn | 2.2                           | 0.1                                  |                |               | X                   | X                |                |               | X                   | X                |
| Zingiberaceae  | <i>Costus guanaiensis</i> var. <i>tarmicus</i> (Loes.) Maas <sup>1</sup> | (caña agria)                        | Cu                               | h           | orn | 1.1                           | 0.1                                  |                | X             | X                   | X                |                |               | X                   |                  |
| Zingiberaceae  | <i>Etingera elatior</i> (Jack) R.M. Sm.                                  |                                     | Cu                               | h           | orn | 0.2                           |                                      |                |               |                     | X                |                |               |                     |                  |
| Zingiberaceae  | <i>Hedychium coronarium</i> J. König                                     |                                     | Es                               | h           | orn | 4.8                           |                                      |                |               | X                   | X                |                |               |                     |                  |
| Zingiberaceae  | <i>Zingiber officinale</i> Roscoe                                        | Ginger (gengibre)                   | Cu                               | h           | med | 0.2                           | 0.2                                  |                |               | X                   |                  |                |               | X                   | X                |
| Zygophyllaceae | <i>Tribulus cistoides</i> L.                                             | (cacho de chivo)                    | NaQ                              | v           | non | 0.2                           | 10.8                                 | X              |               |                     |                  | X              | X             | X                   | X                |
| Zygophyllaceae | <i>Tribulus terrestris</i> L.                                            | (cacho de chivo)                    | NaQ                              | v           | non |                               | 0.3                                  |                |               |                     |                  |                | X             |                     | X                |
